# Supplementary material for: First-Principles Study of Adsorption of CH4 on a Fluorinated Model NiF2 Surface
Source: MDPI journal article supplement (doi:10.3390/ma17092062), 2024-04-27
Supplement: s1 [file s1]

## Supporting Information

### First-Principles Study of Adsorption of CH<sub>4</sub> on a Fluorinated Model NiF<sub>2</sub> Surface

T. Lindič and B. Paulus

## List of Figures

|           |                                                                                                                                                                                                                                                                                                                                                                                                                            |    |
|-----------|----------------------------------------------------------------------------------------------------------------------------------------------------------------------------------------------------------------------------------------------------------------------------------------------------------------------------------------------------------------------------------------------------------------------------|----|
| Figure S1 | Adsorbed structures for the adsorption of CH <sub>4</sub> . . . . .                                                                                                                                                                                                                                                                                                                                                        | 5  |
| Figure S2 | Adsorbed structures belonging to group I. . . . .                                                                                                                                                                                                                                                                                                                                                                          | 11 |
| Figure S3 | Adsorbed structures belonging to group II. . . . .                                                                                                                                                                                                                                                                                                                                                                         | 17 |
| Figure S4 | Adsorbed structures belonging to group III. . . . .                                                                                                                                                                                                                                                                                                                                                                        | 20 |
| Figure S5 | Adsorbed structures belonging to group IV. . . . .                                                                                                                                                                                                                                                                                                                                                                         | 22 |
| Figure S6 | Surface energies of different cuts of NiF <sub>2</sub> surface versus the potential calculated via the computational hydrogen electrode. The surface energies of the Ni <sup>2+</sup> to Ni <sup>3+</sup> transition are taken from reference [22]. The same methodology as in this reference was applied to calculate the surface energy of NiF <sub>2</sub> (F <sub>2</sub> ) (001) surface, shown with dashed line. . . | 26 |
| Figure S7 | Imaginary vibrational mode displacements of the calculated transition state (image 4 in Figure 7 in the manuscript), with movement of atoms depicted by red arrows. . . .                                                                                                                                                                                                                                                  | 27 |

## List of Tables

|           |                                                                                                                                                                                                                                                                         |    |
|-----------|-------------------------------------------------------------------------------------------------------------------------------------------------------------------------------------------------------------------------------------------------------------------------|----|
| Table S1  | Adsorption energies and structural parameters for the adsorption of CH <sub>4</sub> . N.B.: d(NiF/HF) may represent the Ni–F or H–F distance and should be interpreted together with the figure of the appropriate structure; the same holds true for d(CF/HF). . . . . | 4  |
| Table S2  | Magnetic moments on the surface nickel, fluorine and the adsorbate. . . . .                                                                                                                                                                                             | 6  |
| Table S3  | Charge transfer on the surface nickel, fluorine and the adsorbate for adsorbed CH <sub>4</sub> . . .                                                                                                                                                                    | 6  |
| Table S4  | Calculated frequencies for the adsorption of CH <sub>4</sub> . . . . .                                                                                                                                                                                                  | 6  |
| Table S5  | Adsorption energies and bond distances for the adsorbed structures in group I. . . . .                                                                                                                                                                                  | 7  |
| Table S6  | Magnetic moments on the surface nickel, fluorine and on the adsorbates for group I. .                                                                                                                                                                                   | 12 |
| Table S7  | Charge transfer for the surface nickel, fluorine and the adsorbates for group I. . . . .                                                                                                                                                                                | 12 |
| Table S8  | Calculated frequencies for group I. . . . .                                                                                                                                                                                                                             | 13 |
| Table S9  | Adsorption energies and bond distances for the adsorbed structures in group II. . . . .                                                                                                                                                                                 | 17 |
| Table S10 | Magnetic moments on the surface nickel, fluorine and on the adsorbates for group II. .                                                                                                                                                                                  | 17 |
| Table S11 | Charge transfer for the surface nickel, fluorine and the adsorbates for group II. . . . .                                                                                                                                                                               | 17 |
| Table S12 | Calculated frequencies for group II . . . . .                                                                                                                                                                                                                           | 17 |
| Table S13 | Adsorption energies and bond distances for the adsorbed structures in group III. . . .                                                                                                                                                                                  | 18 |
| Table S14 | Magnetic moments on the surface nickel, fluorine and on the adsorbates for group III. .                                                                                                                                                                                 | 18 |
| Table S15 | Charge transfer for the surface nickel, fluorine and the adsorbates for group III. . . . .                                                                                                                                                                              | 18 |

|           |                                                                                         |    |
|-----------|-----------------------------------------------------------------------------------------|----|
| Table S16 | Calculated frequencies for group III . . . . .                                          | 19 |
| Table S17 | Adsorption energies and bond distances for the adsorbed structures in group IV. . . .   | 20 |
| Table S18 | Magnetic moments on the surface nickel, fluorine and on the adsorbates for group IV.    | 23 |
| Table S19 | Charge transfer for the surface nickel, fluorine and the adsorbates for group IV. . . . | 23 |
| Table S20 | Calculated frequencies for group IV . . . . .                                           | 24 |

On the following pages numerical results belonging to the paper "First-Principles Study of Adsorption of CH<sub>4</sub> on a Fluorinated Model NiF<sub>2</sub> Surface" are collected. For the adsorption of CH<sub>4</sub> the methane molecule was placed on the surface at six different higher symmetry positions and three different distances (1.5, 1.7 and 2.0 Å, respectively) which is indicated in the tables. For the study of co-adsorption of CH<sub>4</sub> and HF only one distance from the surface was considered. All possible combinations of methane and HF on the 6 higher symmetry positions were considered. Furthermore, three different orientations of the HF molecule were considered, namely flat, F down and F up (with respect to the surface). The starting orientations are indicated in the tables.

All the presented results are the calculations done in VASP within the framework of spin unrestricted PBE+U D3(BJ) approach, with the kinetic cut-off energy of 700 eV and the K-point mesh of 8×8×1. More detailed model details and computational settings are described in the main text.

The following data are presented in the tables:

- #: numbering of the structure in each group
- Distance: distance of the adsorbates from the surface in the starting structure
- Position: position of the adsorbates on the surface; in case of co-adsorption the first number indicates position of CH<sub>4</sub> and the second the position of HF
- Orientation: u - up, d - down, f - flat; regarding the orientation of co-adsorbed HF as explained in the main text
- $E_{ads}$ : adsorption energy as defined in the main text, in eV
- $d(X_1X_2)$ : bond length between element  $X_1$  and  $X_2$ , where X is the element symbol; in Å
- magnetic moments are in the units of  $\mu_B$
- charge transfer, as defined in the main text, in the units of e
- vibrational frequencies are in the units of  $\text{cm}^{-1}$

A careful reader might notice the presence of some low imaginary frequencies for some of the structures. These mostly occur for weakly physisorbed cases where many possible rotations of adsorbates with low energy barriers are possible. It is important to note that these specific structures do not represent the energetically most favourable configurations. Consequently, the substantial computational cost required to refine these structures and eliminate the imaginary frequencies was considered disproportionate to the potential gain in scientific understanding and thus, deemed not justifiable.

# 1 Adsorption of CH<sub>4</sub>

Table S1: Adsorption energies and structural parameters for the adsorption of CH<sub>4</sub>. N.B.: d(NiF/HF) may represent the Ni–F or H–F distance and should be interpreted together with the figure of the appropriate structure; the same holds true for d(CF/HF).

| #  | Distance | Position | E <sub>ads</sub> | d(NiF) | d(NiF/HF) | d(CH) | d(CH) | d(CH) | d(CF/HF) |
|----|----------|----------|------------------|--------|-----------|-------|-------|-------|----------|
| 1  | 1.7      | 0        | -10.2826         | 2.067  | 2.156     | 1.091 | 1.094 | 1.096 | 1.433    |
| 2  | 1.7      | 3        | -10.2822         | 2.067  | 2.156     | 1.092 | 1.093 | 1.096 | 1.433    |
| 3  | 1.7      | 5        | -10.2518         | 2.054  | 2.206     | 1.092 | 1.093 | 1.096 | 1.436    |
| 4  | 1.7      | 2        | -9.2965          | 2.275  | 0.984     | 1.088 | 1.089 | 1.093 | 1.456    |
| 5  | 1.5      | 5        | -8.5881          | 1.828  | 1.030     | 1.094 | 1.094 | 1.095 | 1.467    |
| 6  | 2.0      | 5        | -8.5864          | 1.833  | 1.027     | 1.094 | 1.095 | 1.096 | 1.468    |
| 7  | 2.0      | 1        | -8.5859          | 1.826  | 1.030     | 1.094 | 1.094 | 1.095 | 1.467    |
| 8  | 1.7      | 4        | -8.5826          | 1.835  | 1.025     | 1.093 | 1.095 | 1.096 | 1.468    |
| 9  | 1.7      | 1        | -8.4467          | 1.825  | 1.026     | 1.094 | 1.094 | 1.097 | 1.457    |
| 10 | 2.0      | 2        | -8.4459          | 1.826  | 1.025     | 1.094 | 1.094 | 1.097 | 1.456    |
| 11 | 1.5      | 3        | -0.2111          | 1.879  | 1.880     | 1.096 | 1.096 | 1.096 | 1.097    |
| 12 | 2.0      | 3        | -0.2035          | 1.876  | 1.883     | 1.095 | 1.096 | 1.096 | 1.097    |
| 13 | 1.5      | 4        | -0.1765          | 1.877  | 1.883     | 1.095 | 1.096 | 1.096 | 1.097    |
| 14 | 2.0      | 0        | -0.1736          | 1.872  | 1.889     | 1.096 | 1.096 | 1.096 | 1.097    |
| 15 | 1.5      | 0        | -0.1722          | 1.867  | 1.893     | 1.096 | 1.096 | 1.096 | 1.097    |
| 16 | 2.0      | 4        | -0.1703          | 1.878  | 1.882     | 1.096 | 1.096 | 1.097 | 1.097    |



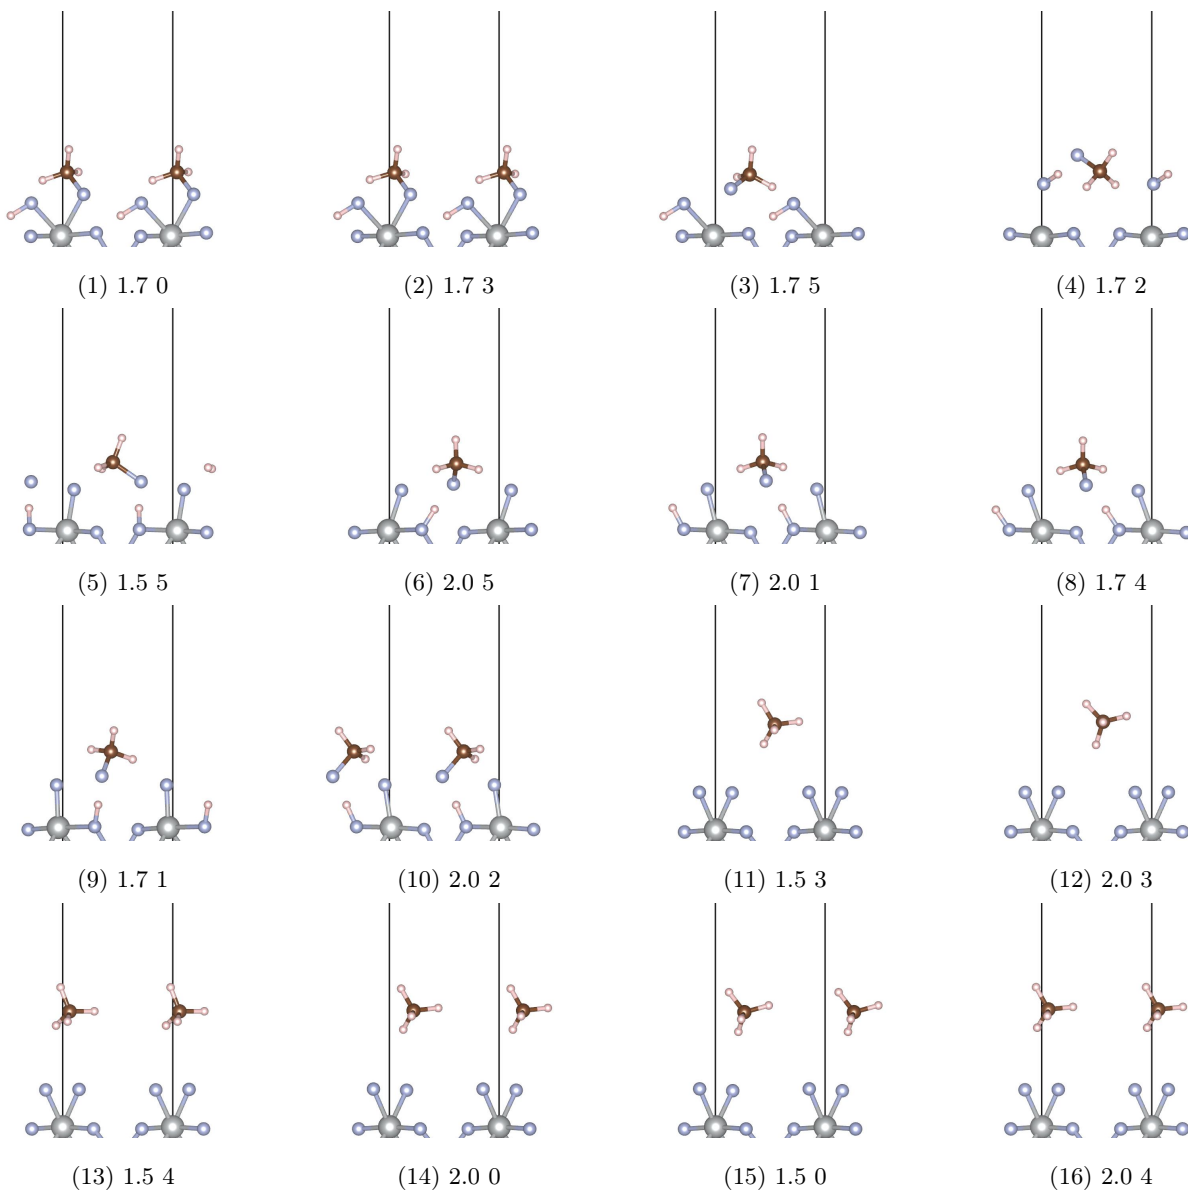

Figure S1: Adsorbed structures for the adsorption of  $\text{CH}_4$ .

Table S2: Magnetic moments on the surface nickel, fluorine and the adsorbate.

| #  | Distance | Position | Ni     | F      | F      | C      | H      | H      | H      | H      |
|----|----------|----------|--------|--------|--------|--------|--------|--------|--------|--------|
| 1  | 1.7      | 0        | -1.827 | -0.014 | -0.022 | -0.0   | -0.0   | -0.0   | -0.0   | -0.0   |
| 2  | 1.7      | 3        | -1.827 | -0.014 | -0.022 | -0.0   | -0.0   | -0.0   | -0.0   | -0.0   |
| 3  | 1.7      | 5        | -1.828 | -0.01  | -0.023 | -0.001 | -0.0   | -0.0   | 0.0    | -0.0   |
| 4  | 1.7      | 2        | -1.819 | -0.008 | -0.0   | -0.0   | -0.0   | -0.0   | -0.0   | -0.0   |
| 5  | 1.5      | 5        | -1.818 | -0.06  | -0.0   | -0.0   | -0.0   | 0.0    | 0.0    | 0.0    |
| 6  | 2.0      | 5        | -1.819 | -0.057 | -0.0   | -0.0   | -0.0   | 0.0    | 0.0    | 0.0    |
| 7  | 2.0      | 1        | -1.818 | -0.0   | -0.06  | -0.0   | 0.0    | -0.0   | 0.0    | 0.0    |
| 8  | 1.7      | 4        | -1.819 | -0.001 | -0.056 | -0.0   | 0.0    | -0.0   | 0.0    | 0.0    |
| 9  | 1.7      | 1        | -1.819 | 0.0    | -0.062 | -0.0   | -0.0   | -0.0   | -0.0   | 0.0    |
| 10 | 2.0      | 2        | -1.819 | 0.0    | -0.062 | -0.0   | -0.0   | -0.0   | -0.0   | 0.0    |
| 11 | 1.5      | 3        | -2.218 | -0.582 | -0.59  | -0.002 | -0.002 | -0.001 | -0.001 | -0.001 |
| 12 | 2.0      | 3        | -2.218 | -0.585 | -0.588 | -0.002 | -0.001 | -0.001 | -0.001 | -0.001 |
| 13 | 1.5      | 4        | -2.219 | -0.587 | -0.587 | -0.0   | -0.0   | -0.0   | -0.0   | -0.0   |
| 14 | 2.0      | 0        | -2.218 | -0.585 | -0.589 | -0.001 | -0.0   | -0.0   | -0.0   | -0.001 |
| 15 | 1.5      | 0        | -2.218 | -0.582 | -0.59  | -0.001 | -0.0   | -0.0   | -0.0   | -0.001 |
| 16 | 2.0      | 4        | -2.219 | -0.587 | -0.586 | -0.0   | -0.0   | -0.0   | -0.0   | -0.0   |

Table S3: Charge transfer on the surface nickel, fluorine and the adsorbate for adsorbed CH<sub>4</sub>.

| #  | Distance | Position | Ni     | F      | F     | C      | H      | H      | H      | H      |
|----|----------|----------|--------|--------|-------|--------|--------|--------|--------|--------|
| 1  | 1.7      | 0        | 0.279  | 0.349  | 0.494 | -0.534 | -0.009 | -0.044 | -0.081 | -0.708 |
| 2  | 1.7      | 3        | 0.285  | 0.346  | 0.493 | -0.487 | -0.032 | -0.052 | -0.095 | -0.706 |
| 3  | 1.7      | 5        | 0.281  | 0.362  | 0.493 | -0.475 | -0.033 | -0.105 | -0.063 | -0.712 |
| 4  | 1.7      | 2        | 0.294  | 0.491  | 0.378 | -0.496 | -0.077 | -0.066 | -0.044 | -0.727 |
| 5  | 1.5      | 5        | 0.314  | 0.449  | 0.371 | -0.370 | -0.142 | -0.017 | -0.151 | -0.725 |
| 6  | 2.0      | 5        | 0.314  | 0.450  | 0.368 | -0.411 | -0.118 | -0.122 | -0.025 | -0.735 |
| 7  | 2.0      | 1        | 0.314  | 0.349  | 0.467 | -0.393 | -0.036 | -0.125 | -0.123 | -0.732 |
| 8  | 1.7      | 4        | 0.311  | 0.349  | 0.470 | -0.424 | -0.009 | -0.117 | -0.126 | -0.730 |
| 9  | 1.7      | 1        | 0.315  | 0.340  | 0.467 | -0.420 | -0.020 | -0.158 | -0.072 | -0.730 |
| 10 | 2.0      | 2        | 0.316  | 0.340  | 0.467 | -0.431 | -0.087 | -0.126 | -0.027 | -0.731 |
| 11 | 1.5      | 3        | 0.000  | 0.010  | 0.014 | -0.040 | -0.008 | -0.008 | 0.025  | 0.006  |
| 12 | 2.0      | 3        | 0.000  | -0.004 | 0.026 | -0.068 | 0.029  | 0.013  | 0.009  | -0.005 |
| 13 | 1.5      | 4        | -0.002 | 0.002  | 0.019 | -0.032 | 0.011  | -0.010 | 0.002  | 0.011  |
| 14 | 2.0      | 0        | -0.002 | 0.009  | 0.013 | -0.013 | -0.007 | -0.003 | 0.007  | -0.004 |
| 15 | 1.5      | 0        | 0.003  | 0.006  | 0.015 | -0.018 | -0.013 | 0.014  | -0.006 | 0.001  |
| 16 | 2.0      | 4        | -0.001 | 0.007  | 0.013 | -0.044 | 0.007  | 0.013  | 0.017  | -0.011 |

Table S4: Calculated frequencies for the adsorption of CH<sub>4</sub>.

| 0       | 3       | 5       | 2       | 5       | 5       | 1       | 4       |
|---------|---------|---------|---------|---------|---------|---------|---------|
| 1.7     | 1.7     | 1.7     | 1.7     | 1.5     | 2.0     | 2.0     | 1.7     |
| 3142.13 | 3140.05 | 3141.49 | 3181.78 | 3121.76 | 3120.42 | 3119.13 | 3121.7  |
| 3106.18 | 3107.07 | 3109.12 | 3159.0  | 3098.35 | 3094.3  | 3098.06 | 3095.03 |
| 3009.25 | 3009.0  | 3011.44 | 3074.77 | 2994.24 | 2990.57 | 2993.23 | 2991.35 |
| 2133.2  | 2137.64 | 2212.01 | 3042.55 | 2416.4  | 2435.79 | 2411.11 | 2452.02 |
| 1434.77 | 1434.09 | 1457.19 | 1428.68 | 1474.6  | 1471.88 | 1472.73 | 1472.82 |
| 1425.44 | 1423.3  | 1429.97 | 1427.59 | 1438.15 | 1438.58 | 1437.37 | 1438.15 |
| 1419.14 | 1418.48 | 1418.39 | 1392.71 | 1428.85 | 1428.11 | 1429.39 | 1427.63 |
| 1206.73 | 1205.92 | 1194.89 | 1139.79 | 1173.44 | 1171.91 | 1172.45 | 1171.17 |
| 1157.15 | 1156.71 | 1152.52 | 1117.09 | 1150.47 | 1150.86 | 1149.16 | 1150.22 |
| 1145.88 | 1144.96 | 1148.25 | 943.8   | 1036.59 | 1032.92 | 1040.08 | 1028.49 |
| 1028.76 | 1027.23 | 1027.75 | 852.37  | 975.35  | 972.75  | 972.38  | 969.39  |

Continued on next page

|         |         |         |         |         |         |         |         |
|---------|---------|---------|---------|---------|---------|---------|---------|
| 938.59  | 939.07  | 923.67  | 825.15  | 850.26  | 847.92  | 849.51  | 845.23  |
| 369.83  | 369.29  | 369.19  | 444.79  | 472.86  | 467.7   | 477.04  | 467.08  |
| 252.48  | 253.12  | 248.99  | 277.4   | 285.55  | 286.34  | 282.71  | 278.68  |
| 203.17  | 202.52  | 200.43  | 148.87  | 201.53  | 203.48  | 199.0   | 203.19  |
| 180.15  | 179.67  | 171.01  | 140.8   | 180.89  | 185.59  | 181.73  | 189.0   |
| 143.23  | 141.78  | 163.55  | 98.19   | 160.77  | 151.99  | 158.01  | 150.42  |
| 111.58  | 108.98  | 129.29  | 62.01   | 119.82  | 121.52  | 118.59  | 125.93  |
| 97.28   | 95.9    | 111.39  | 20.15   | 96.51   | 96.93   | 92.64   | 92.01   |
| 84.84   | 73.77   | 82.56   | 27.5i   | 75.67   | 87.97   | 75.73   | 84.59   |
| 57.15   | 43.77   | 62.7    | 107.07i | 31.09   | 29.84   | 34.29   | 35.04i  |
| 1       | 2       | 3       | 3       | 4       | 0       | 0       | 4       |
| 1.7     | 2.0     | 1.5     | 2.0     | 1.5     | 2.0     | 1.5     | 2.0     |
| 3124.23 | 3120.67 | 3071.65 | 3057.0  | 3079.85 | 3074.63 | 3070.38 | 3073.4  |
| 3097.68 | 3094.84 | 3046.05 | 3047.09 | 3047.02 | 3046.45 | 3042.9  | 3050.06 |
| 2990.78 | 2988.06 | 2998.96 | 2993.96 | 3002.9  | 3002.1  | 2996.92 | 2989.45 |
| 2461.51 | 2466.79 | 2963.79 | 2963.43 | 2966.3  | 2966.85 | 2965.24 | 2965.74 |
| 1469.44 | 1468.7  | 1351.47 | 1327.9  | 1391.09 | 1390.78 | 1399.52 | 1395.48 |
| 1433.29 | 1432.37 | 1298.71 | 1281.8  | 1297.42 | 1304.12 | 1277.27 | 1280.47 |
| 1403.67 | 1403.81 | 1232.45 | 1218.08 | 1248.62 | 1243.79 | 1243.2  | 1236.94 |
| 1177.69 | 1178.25 | 1185.74 | 1188.4  | 1193.43 | 1197.24 | 1197.08 | 1187.52 |
| 1153.22 | 1153.54 | 1094.76 | 1099.13 | 1080.55 | 1093.4  | 1096.12 | 1061.13 |
| 1076.58 | 1075.29 | 469.6   | 469.78  | 469.15  | 467.96  | 468.49  | 468.66  |
| 916.44  | 910.44  | 244.75  | 244.64  | 243.67  | 250.06  | 256.29  | 242.16  |
| 882.56  | 886.79  | 230.16  | 231.72  | 235.24  | 232.21  | 233.02  | 234.43  |
| 472.49  | 470.72  | 137.5   | 140.02  | 139.38  | 143.52  | 144.77  | 141.71  |
| 279.75  | 275.88  | 131.75  | 136.05  | 137.05  | 142.1   | 136.56  | 136.71  |
| 183.42  | 186.57  | 70.32   | 73.61   | 81.46   | 77.45   | 83.03   | 70.09   |
| 162.68  | 158.87  | 64.96   | 65.72   | 72.19   | 66.33   | 62.7    | 65.71   |
| 149.81  | 143.26  | 61.71   | 33.24   | 53.57   | 28.89   | 19.81   | 23.71   |
| 126.39  | 129.04  | 34.98   | 8.17i   | 8.78    | 15.94   | 8.14i   | 32.26i  |
| 82.9    | 78.84   | 13.07   | 48.41i  | 25.85i  | 25.2i   | 42.96i  | 43.22i  |
| 64.53   | 57.59   | 23.83i  | 56.84i  | 49.1i   | 44.02i  | 53.88i  | 66.65i  |
| 32.86   | 41.97   | 60.72i  | 83.49i  | 66.38i  | 63.78i  | 71.89i  | 76.49i  |

## 2 Co-adsorption of CH<sub>4</sub> and HF

### 2.1 Group I

Table S5: Adsorption energies and bond distances for the adsorbed structures in group I.

| # | Orientation | Position | E <sub>ads</sub> | d(CH) | d(CH) | d(CH) | d(CF) | d(NiF) | d(NiF) | d(HF) | d(HF) |
|---|-------------|----------|------------------|-------|-------|-------|-------|--------|--------|-------|-------|
| 1 | d           | 5_1      | -11.5292         | 1.096 | 1.097 | 1.097 | 1.413 | 2.030  | 2.033  | 1.013 | 1.013 |
| 2 | u           | 2_5      | -11.5231         | 1.097 | 1.097 | 1.098 | 1.416 | 2.034  | 2.038  | 1.011 | 1.011 |
| 3 | f           | 4_1      | -11.4700         | 1.097 | 1.097 | 1.097 | 1.414 | 2.034  | 2.038  | 1.010 | 1.011 |
| 4 | u           | 0_4      | -11.4406         | 1.097 | 1.097 | 1.097 | 1.415 | 2.033  | 2.039  | 1.010 | 1.012 |

Continued on next page

| #  | Orientation | Position | E <sub>ads</sub> | d(CH) | d(CH) | d(CH) | d(CF) | d(NiF) | d(NiF) | d(HF) | d(HF) |
|----|-------------|----------|------------------|-------|-------|-------|-------|--------|--------|-------|-------|
| 5  | d           | 4_0      | -11.2778         | 1.092 | 1.092 | 1.093 | 1.452 | 2.068  | 2.110  | 1.118 | 0.965 |
| 6  | u           | 4_2      | -11.2673         | 1.091 | 1.093 | 1.093 | 1.453 | 2.089  | 2.106  | 1.104 | 0.961 |
| 7  | f           | 4_2      | -11.2670         | 1.091 | 1.093 | 1.093 | 1.453 | 2.088  | 2.107  | 1.104 | 0.961 |
| 8  | u           | 4_0      | -11.2132         | 1.097 | 1.098 | 1.098 | 1.414 | 2.040  | 2.044  | 0.991 | 0.988 |
| 9  | u           | 0_5      | -11.1536         | 1.092 | 1.093 | 1.094 | 1.452 | 2.212  | 2.246  | 1.088 | 0.961 |
| 10 | f           | 3_5      | -11.1535         | 1.092 | 1.093 | 1.094 | 1.452 | 2.215  | 2.244  | 1.087 | 0.961 |
| 11 | d           | 4_1      | -11.1425         | 1.092 | 1.093 | 1.094 | 1.442 | 2.082  | 2.105  | 1.063 | 0.968 |
| 12 | f           | 0_1      | -11.1355         | 1.092 | 1.092 | 1.093 | 1.449 | 2.203  | 2.249  | 1.090 | 0.963 |
| 13 | f           | 4_5      | -11.1253         | 1.093 | 1.094 | 1.095 | 1.441 | 2.086  | 2.106  | 1.058 | 0.968 |
| 14 | f           | 1_3      | -11.1235         | 1.092 | 1.093 | 1.095 | 1.441 | 2.087  | 2.107  | 1.060 | 0.968 |
| 15 | f           | 4_3      | -11.1234         | 1.092 | 1.093 | 1.095 | 1.441 | 2.088  | 2.106  | 1.059 | 0.968 |
| 16 | u           | 0_1      | -11.1219         | 1.092 | 1.093 | 1.095 | 1.441 | 2.088  | 2.104  | 1.060 | 0.968 |
| 17 | u           | 4_3      | -11.1167         | 1.092 | 1.093 | 1.094 | 1.442 | 2.089  | 2.102  | 1.060 | 0.968 |
| 18 | u           | 5_1      | -11.0900         | 1.091 | 1.093 | 1.095 | 1.440 | 2.061  | 2.146  | 1.057 | 0.966 |
| 19 | u           | 2_1      | -11.0536         | 1.096 | 1.097 | 1.098 | 1.416 | 2.079  | 2.119  | 1.067 | 0.967 |
| 20 | f           | 4_0      | -11.0093         | 1.096 | 1.097 | 1.098 | 1.417 | 2.085  | 2.122  | 1.065 | 0.967 |
| 21 | f           | 2_4      | -11.0076         | 1.093 | 1.095 | 1.096 | 1.436 | 2.072  | 2.126  | 1.047 | 0.962 |
| 22 | d           | 0_1      | -10.9160         | 1.097 | 1.097 | 1.097 | 1.416 | 2.219  | 2.220  | 1.088 | 0.978 |
| 23 | f           | 3_1      | -10.8636         | 1.091 | 1.094 | 1.095 | 1.441 | 2.150  | 2.349  | 1.048 | 0.963 |
| 24 | f           | 1_0      | -10.8488         | 1.093 | 1.094 | 1.094 | 1.442 | 2.200  | 2.303  | 1.052 | 0.964 |
| 25 | u           | 1_5      | -10.8109         | 1.092 | 1.096 | 1.096 | 1.430 | 2.164  | 2.304  | 1.040 | 0.960 |
| 26 | u           | 4_1      | -10.2132         | 1.092 | 1.095 | 1.095 | 1.443 | 2.079  | 2.156  | 1.055 | 0.965 |
| 27 | f           | 0_5      | -10.1197         | 1.097 | 1.097 | 1.097 | 1.415 | 2.034  | 2.045  | 1.011 | 1.012 |
| 28 | d           | 0_4      | -10.0996         | 1.089 | 1.090 | 1.092 | 1.490 | 1.873  | 2.455  | 1.011 | 0.996 |
| 29 | u           | 3_4      | -10.0384         | 1.089 | 1.090 | 1.092 | 1.490 | 1.874  | 2.495  | 0.996 | 1.017 |
| 30 | u           | 3_2      | -10.0369         | 1.089 | 1.089 | 1.091 | 1.490 | 1.876  | 2.466  | 0.997 | 1.015 |
| 31 | f           | 0_3      | -10.0356         | 1.088 | 1.093 | 1.093 | 1.472 | 2.282  | -      | 0.990 | 0.990 |
| 32 | f           | 5_1      | -10.0353         | 1.087 | 1.093 | 1.093 | 1.472 | 2.280  | -      | 0.990 | 0.990 |
| 33 | d           | 5_4      | -10.0081         | 1.090 | 1.091 | 1.092 | 1.481 | 1.860  | -      | 0.990 | 1.043 |
| 34 | d           | 5_0      | -10.0074         | 1.091 | 1.091 | 1.092 | 1.481 | 1.861  | -      | 0.990 | 1.044 |
| 35 | d           | 2_0      | -10.0041         | 1.089 | 1.091 | 1.092 | 1.489 | 1.863  | -      | 0.987 | 1.035 |
| 36 | d           | 2_4      | -10.0040         | 1.090 | 1.091 | 1.092 | 1.480 | 1.859  | -      | 0.988 | 1.047 |
| 37 | u           | 3_0      | -9.9971          | 1.087 | 1.093 | 1.093 | 1.475 | 2.161  | -      | 0.993 | 1.000 |
| 38 | u           | 5_0      | -9.9965          | 1.087 | 1.093 | 1.093 | 1.475 | 2.158  | -      | 0.992 | 1.000 |
| 39 | u           | 5_3      | -9.9962          | 1.088 | 1.093 | 1.093 | 1.475 | 2.166  | -      | 0.993 | 1.000 |
| 40 | u           | 2_0      | -9.9467          | 1.089 | 1.091 | 1.091 | 1.488 | 1.864  | -      | 0.986 | 1.043 |
| 41 | u           | 2_4      | -9.9467          | 1.089 | 1.091 | 1.091 | 1.488 | 1.864  | -      | 0.986 | 1.043 |
| 42 | f           | 0_4      | -9.9464          | 1.089 | 1.091 | 1.091 | 1.491 | 1.868  | -      | 0.988 | 1.037 |
| 43 | u           | 1_0      | -9.9128          | 1.086 | 1.087 | 1.094 | 1.475 | 2.139  | -      | 0.996 | 1.000 |
| 44 | f           | 3_0      | -9.9115          | 1.089 | 1.091 | 1.091 | 1.491 | 1.868  | -      | 0.988 | 1.038 |
| 45 | u           | 3_1      | -9.8759          | 1.089 | 1.089 | 1.090 | 1.491 | 1.868  | -      | 0.981 | 1.041 |
| 46 | f           | 2_1      | -9.6577          | 1.091 | 1.093 | 1.094 | 1.478 | 2.287  | -      | 0.949 | 0.973 |
| 47 | f           | 2_5      | -9.4962          | 1.097 | 1.097 | 1.097 | 1.417 | 2.221  | -      | 0.974 | 1.073 |
| 48 | f           | 2_0      | -9.2559          | 1.089 | 1.090 | 1.092 | 1.488 | 1.864  | -      | 0.987 | 1.042 |
| 49 | f           | 3_4      | -9.0016          | 1.091 | 1.092 | 1.093 | 1.449 | 2.189  | -      | 1.087 | 0.960 |
| 50 | u           | 2_3      | -8.6131          | 1.087 | 1.093 | 1.093 | 1.475 | 2.159  | -      | 0.993 | 1.000 |

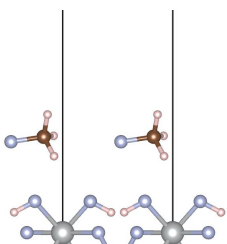

(1) d 5\_1

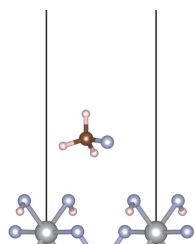

(2) u 2\_5

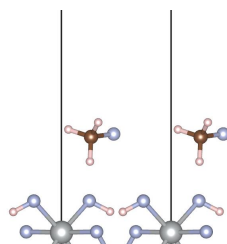

(3) f 4\_1

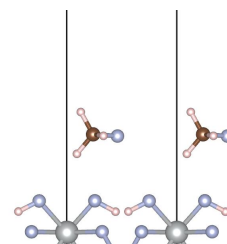

(4) u 0\_4

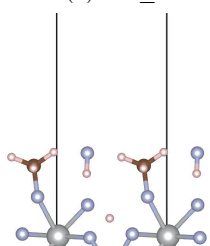

(5) d 4\_0

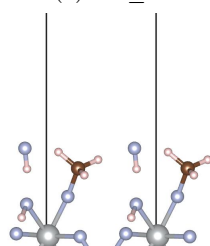

(6) u 4\_2

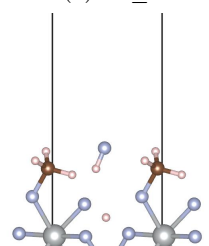

(7) f 4\_2

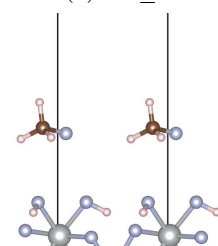

(8) u 4\_0

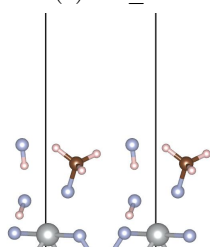

(9) u 0\_5

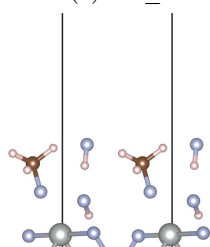

(10) f 3\_5

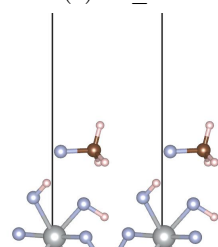

(11) d 4\_1

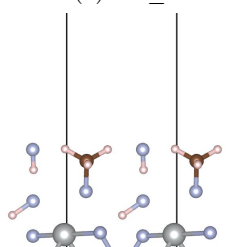

(12) f 0\_1

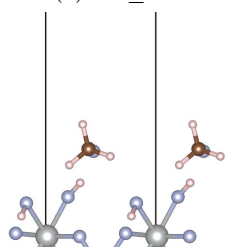

(13) f 4\_5

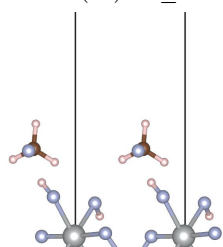

(14) f 1\_3

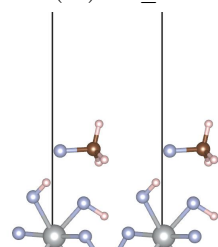

(15) f 4\_3

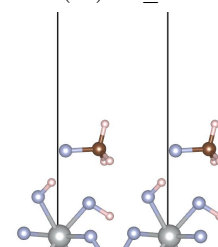

(16) u 0\_1

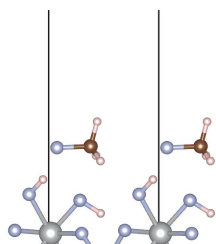

(17) u 4\_3

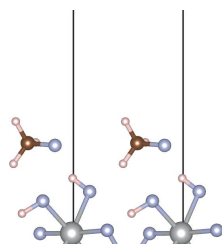

(18) u 5\_1

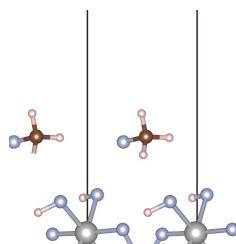

(19) u 2\_1

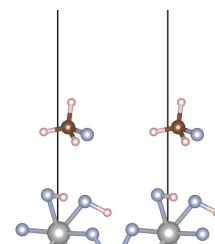

(20) f 4\_0

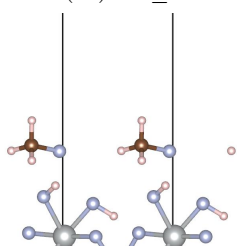

(21) f 2\_4

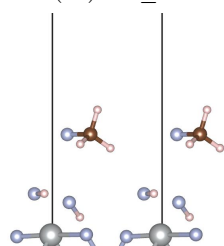

(22) d 0\_1

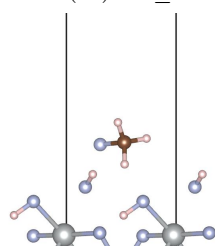

(23) f 3\_1

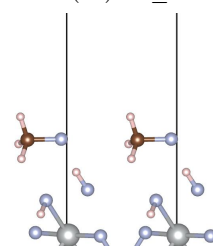

(24) f 1\_0

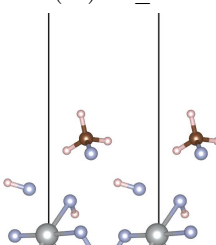

(25) u 1\_5

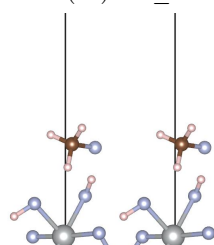

(26) u 4\_1

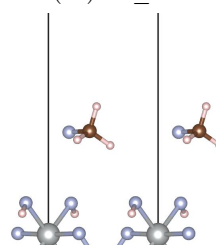

(27) f 0\_5

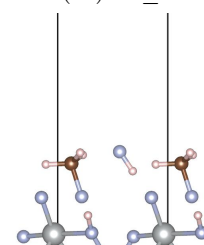

(28) d 0\_4

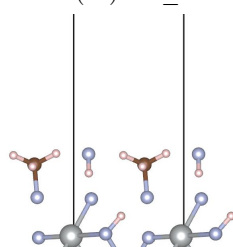

(29) u 3\_4

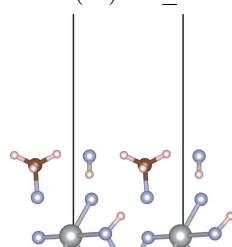

(30) u 3\_2

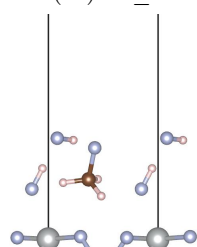

(31) f 0\_3

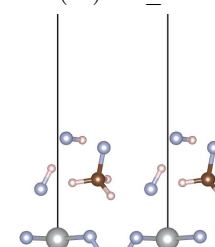

(32) f 5\_1

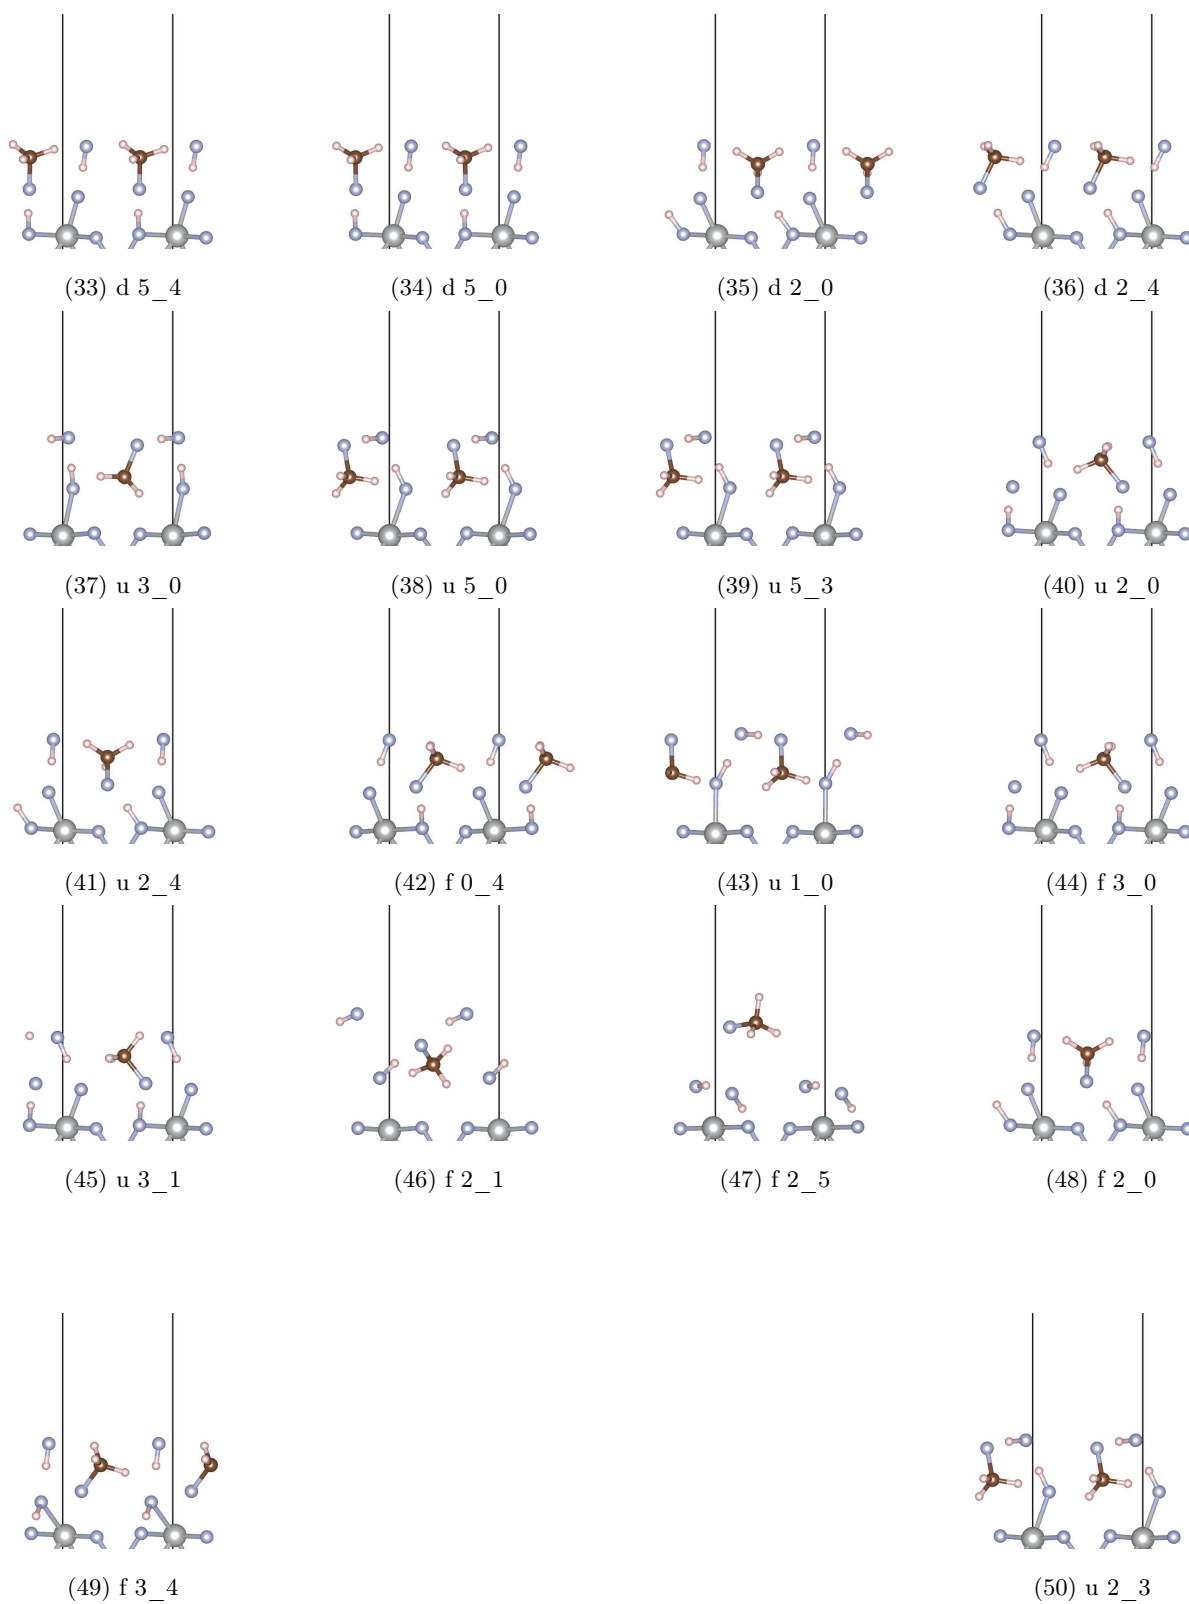

Figure S2: Adsorbed structures belonging to group I.

Table S6: Magnetic moments on the surface nickel, fluorine and on the adsorbates for group I.

| #  | Orientation | Position        | Ni     | F      | F      | C      | H      | H      | H      | H      | H      | F      |
|----|-------------|-----------------|--------|--------|--------|--------|--------|--------|--------|--------|--------|--------|
| 1  | d           | 5 <sub>-1</sub> | -1.837 | -0.023 | -0.022 | -0.000 | -0.000 | -0.000 | -0.000 | -0.000 | -0.000 | -0.000 |
| 2  | u           | 2 <sub>-5</sub> | -1.837 | -0.022 | -0.022 | -0.000 | -0.000 | -0.000 | 0.000  | -0.000 | -0.000 | -0.000 |
| 3  | f           | 4 <sub>-1</sub> | -1.837 | -0.022 | -0.022 | -0.000 | -0.000 | 0.000  | -0.000 | -0.000 | -0.000 | -0.000 |
| 4  | u           | 0 <sub>-4</sub> | -1.837 | -0.022 | -0.022 | -0.000 | -0.000 | -0.000 | -0.000 | -0.000 | -0.000 | -0.000 |
| 5  | d           | 4 <sub>-0</sub> | -1.830 | -0.020 | -0.014 | -0.001 | -0.000 | -0.000 | -0.001 | -0.000 | -0.000 | -0.001 |
| 6  | u           | 4 <sub>-2</sub> | -1.830 | -0.016 | -0.019 | -0.001 | -0.000 | -0.000 | -0.000 | -0.000 | -0.001 | -0.000 |
| 7  | f           | 4 <sub>-2</sub> | -1.830 | -0.019 | -0.016 | -0.001 | -0.000 | -0.000 | -0.000 | -0.000 | -0.000 | -0.001 |
| 8  | u           | 4 <sub>-0</sub> | -1.831 | -0.022 | -0.022 | -0.000 | -0.000 | -0.000 | -0.000 | -0.000 | -0.000 | -0.000 |
| 9  | u           | 0 <sub>-5</sub> | -1.833 | -0.013 | -0.016 | -0.000 | -0.000 | -0.000 | -0.000 | -0.000 | -0.001 | -0.000 |
| 10 | f           | 3 <sub>-5</sub> | -1.833 | -0.016 | -0.013 | -0.000 | -0.000 | -0.000 | -0.000 | -0.000 | -0.000 | -0.001 |
| 11 | d           | 4 <sub>-1</sub> | -1.830 | -0.021 | -0.014 | -0.000 | -0.000 | -0.000 | -0.000 | -0.000 | -0.000 | -0.000 |
| 12 | f           | 0 <sub>-1</sub> | -1.834 | -0.012 | -0.016 | -0.001 | -0.000 | -0.000 | -0.000 | -0.000 | -0.000 | -0.001 |
| 13 | f           | 4 <sub>-5</sub> | -1.830 | -0.014 | -0.021 | -0.000 | -0.000 | -0.000 | -0.000 | -0.000 | -0.000 | -0.000 |
| 14 | f           | 1 <sub>-3</sub> | -1.830 | -0.000 | -0.014 | -0.000 | -0.000 | -0.000 | -0.000 | -0.000 | -0.000 | -0.021 |
| 15 | f           | 4 <sub>-3</sub> | -1.830 | -0.021 | -0.014 | -0.000 | -0.000 | -0.000 | -0.000 | -0.000 | -0.000 | -0.000 |
| 16 | u           | 0 <sub>-1</sub> | -1.830 | -0.021 | -0.014 | -0.000 | -0.000 | -0.000 | -0.000 | -0.000 | -0.000 | -0.000 |
| 17 | u           | 4 <sub>-3</sub> | -1.830 | -0.021 | -0.014 | -0.000 | -0.000 | -0.000 | -0.000 | -0.000 | -0.000 | -0.000 |
| 18 | u           | 5 <sub>-1</sub> | -1.829 | -0.013 | -0.022 | -0.000 | -0.000 | -0.000 | -0.000 | -0.000 | -0.000 | -0.000 |
| 19 | u           | 2 <sub>-1</sub> | -1.830 | -0.017 | -0.021 | -0.000 | -0.000 | 0.000  | -0.000 | -0.000 | -0.000 | -0.000 |
| 20 | f           | 4 <sub>-0</sub> | -1.830 | -0.000 | -0.017 | -0.000 | -0.000 | -0.000 | -0.000 | 0.000  | -0.000 | -0.021 |
| 21 | f           | 2 <sub>-4</sub> | -1.829 | -0.022 | -0.013 | -0.000 | -0.000 | -0.000 | -0.000 | -0.000 | -0.000 | -0.000 |
| 22 | d           | 0 <sub>-1</sub> | -1.834 | -0.017 | -0.013 | -0.000 | -0.000 | -0.000 | -0.000 | -0.000 | -0.000 | -0.000 |
| 23 | f           | 3 <sub>-1</sub> | -1.832 | -0.008 | -0.020 | -0.000 | -0.000 | -0.000 | -0.000 | -0.000 | -0.000 | -0.000 |
| 24 | f           | 1 <sub>-0</sub> | -1.832 | -0.009 | -0.018 | -0.000 | -0.000 | -0.000 | -0.000 | -0.000 | -0.000 | -0.000 |
| 25 | u           | 1 <sub>-5</sub> | -1.833 | -0.019 | -0.009 | -0.000 | -0.000 | -0.000 | -0.000 | -0.000 | -0.000 | -0.000 |
| 26 | u           | 4 <sub>-1</sub> | -1.829 | -0.012 | -0.021 | -0.000 | -0.000 | -0.000 | -0.000 | -0.000 | -0.000 | -0.000 |
| 27 | f           | 0 <sub>-5</sub> | -1.839 | -0.023 | -0.023 | -0.000 | -0.000 | -0.000 | -0.000 | -0.000 | -0.000 | -0.000 |
| 28 | d           | 0 <sub>-4</sub> | -1.830 | -0.008 | -0.037 | -0.000 | -0.000 | -0.000 | -0.000 | 0.000  | -0.000 | -0.001 |
| 29 | u           | 3 <sub>-4</sub> | -1.829 | -0.038 | -0.007 | -0.000 | -0.000 | -0.000 | -0.000 | 0.000  | -0.001 | -0.000 |
| 30 | u           | 3 <sub>-2</sub> | -1.829 | -0.038 | -0.007 | -0.000 | -0.000 | -0.000 | -0.000 | 0.000  | -0.001 | -0.000 |
| 31 | f           | 0 <sub>-3</sub> | -1.817 | -0.000 | -0.006 | -0.000 | -0.000 | -0.000 | -0.000 | -0.000 | -0.001 | -0.000 |
| 32 | f           | 5 <sub>-1</sub> | -1.817 | -0.000 | -0.006 | -0.000 | -0.000 | -0.000 | -0.000 | -0.000 | -0.001 | -0.000 |
| 33 | d           | 5 <sub>-4</sub> | -1.826 | -0.040 | -0.000 | -0.000 | -0.000 | -0.000 | -0.000 | 0.000  | -0.000 | -0.002 |
| 34 | d           | 5 <sub>-0</sub> | -1.827 | -0.040 | -0.000 | -0.000 | -0.000 | -0.000 | -0.000 | 0.000  | -0.000 | -0.002 |
| 35 | d           | 2 <sub>-0</sub> | -1.826 | -0.002 | -0.038 | -0.000 | -0.000 | -0.000 | -0.000 | 0.000  | -0.001 | -0.002 |
| 36 | d           | 2 <sub>-4</sub> | -1.826 | -0.000 | -0.041 | -0.000 | -0.000 | -0.000 | -0.000 | 0.000  | -0.000 | -0.002 |
| 37 | u           | 3 <sub>-0</sub> | -1.816 | -0.008 | -0.000 | -0.000 | -0.000 | -0.000 | -0.000 | -0.000 | -0.000 | -0.001 |
| 38 | u           | 5 <sub>-0</sub> | -1.816 | -0.008 | -0.000 | -0.000 | -0.000 | -0.000 | -0.000 | -0.000 | -0.000 | -0.001 |
| 39 | u           | 5 <sub>-3</sub> | -1.816 | -0.008 | -0.000 | -0.000 | -0.000 | -0.000 | -0.000 | -0.000 | -0.000 | -0.001 |
| 40 | u           | 2 <sub>-0</sub> | -1.825 | -0.039 | -0.001 | -0.000 | -0.000 | -0.000 | -0.000 | 0.000  | -0.002 | -0.001 |
| 41 | u           | 2 <sub>-4</sub> | -1.825 | -0.001 | -0.039 | -0.000 | -0.000 | -0.000 | -0.000 | 0.000  | -0.002 | -0.001 |
| 42 | f           | 0 <sub>-4</sub> | -1.826 | -0.002 | -0.038 | -0.000 | -0.000 | -0.000 | -0.000 | 0.000  | -0.001 | -0.002 |
| 43 | u           | 1 <sub>-0</sub> | -1.818 | -0.009 | -0.000 | -0.000 | -0.000 | 0.000  | 0.000  | -0.000 | -0.000 | -0.001 |
| 44 | f           | 3 <sub>-0</sub> | -1.826 | -0.038 | -0.002 | -0.000 | -0.000 | -0.000 | -0.000 | 0.000  | -0.001 | -0.002 |
| 45 | u           | 3 <sub>-1</sub> | -1.826 | -0.038 | -0.002 | -0.000 | -0.000 | -0.001 | 0.000  | 0.000  | -0.002 | 0.000  |
| 46 | f           | 2 <sub>-1</sub> | -1.817 | -0.000 | -0.006 | 0.000  | -0.000 | -0.000 | -0.000 | -0.000 | -0.001 | -0.000 |
| 47 | f           | 2 <sub>-5</sub> | -1.833 | -0.015 | -0.013 | -0.000 | -0.000 | -0.000 | -0.000 | -0.000 | -0.000 | -0.000 |
| 48 | f           | 2 <sub>-0</sub> | -1.826 | -0.001 | -0.039 | -0.000 | -0.000 | -0.000 | -0.000 | 0.000  | -0.001 | -0.002 |
| 49 | f           | 3 <sub>-4</sub> | -1.839 | -0.011 | -0.017 | -0.001 | -0.000 | -0.000 | -0.001 | 0.000  | -0.000 | -0.000 |
| 50 | u           | 2 <sub>-3</sub> | -1.816 | -0.008 | -0.000 | -0.000 | -0.000 | -0.000 | -0.000 | -0.000 | -0.000 | -0.001 |

Table S7: Charge transfer for the surface nickel, fluorine and the adsorbates for group I.

| # | Orientation | Position        | Ni    | F     | F     | C      | H      | H      | H      | H      | F      | H     |
|---|-------------|-----------------|-------|-------|-------|--------|--------|--------|--------|--------|--------|-------|
| 1 | d           | 5 <sub>-1</sub> | 0.273 | 0.448 | 0.465 | -0.548 | -0.028 | -0.044 | -0.032 | -0.705 | -0.141 | 0.047 |
| 2 | u           | 2 <sub>-5</sub> | 0.269 | 0.458 | 0.478 | -0.552 | -0.053 | -0.032 | -0.011 | -0.714 | -0.144 | 0.035 |
| 3 | f           | 4 <sub>-1</sub> | 0.269 | 0.459 | 0.472 | -0.559 | -0.011 | -0.049 | -0.038 | -0.716 | -0.136 | 0.041 |
| 4 | u           | 0 <sub>-4</sub> | 0.270 | 0.460 | 0.481 | -0.552 | -0.043 | -0.044 | -0.016 | -0.716 | -0.137 | 0.031 |

Continued on next page



| #  | Orientation | Position | Ni    | F     | F     | C      | H      | H      | H      | H      | F      | H     |
|----|-------------|----------|-------|-------|-------|--------|--------|--------|--------|--------|--------|-------|
| 5  | d           | 4_0      | 0.269 | 0.467 | 0.365 | -0.445 | -0.721 | -0.097 | -0.085 | -0.703 | 0.000  | 0.701 |
| 6  | u           | 4_2      | 0.271 | 0.350 | 0.485 | -0.465 | -0.064 | -0.080 | -0.075 | -0.701 | -0.020 | 0.051 |
| 7  | f           | 4_2      | 0.271 | 0.466 | 0.369 | -0.492 | -0.066 | -0.052 | -0.073 | -0.708 | -0.013 | 0.051 |
| 8  | u           | 4_0      | 0.280 | 0.452 | 0.466 | -0.543 | -0.034 | -0.055 | -0.016 | -0.712 | -0.144 | 0.034 |
| 9  | u           | 0_5      | 0.270 | 0.351 | 0.493 | -0.463 | -0.744 | -0.073 | -0.059 | -0.083 | 0.022  | 0.048 |
| 10 | f           | 3_5      | 0.265 | 0.476 | 0.373 | -0.465 | -0.092 | -0.072 | -0.052 | -0.721 | 0.000  | 0.046 |
| 11 | d           | 4_1      | 0.276 | 0.478 | 0.472 | -0.490 | -0.085 | -0.026 | -0.711 | -0.087 | -0.132 | 0.047 |
| 12 | f           | 0_1      | 0.267 | 0.351 | 0.493 | -0.472 | -0.044 | -0.079 | -0.081 | -0.719 | -0.004 | 0.048 |
| 13 | f           | 4_5      | 0.283 | 0.471 | 0.495 | -0.493 | -0.089 | -0.038 | -0.730 | -0.067 | -0.132 | 0.048 |
| 14 | f           | 1_3      | 0.284 | 0.366 | 0.492 | -0.477 | -0.733 | -0.094 | -0.039 | -0.071 | -0.026 | 0.048 |
| 15 | f           | 4_3      | 0.283 | 0.477 | 0.493 | -0.492 | -0.051 | -0.091 | -0.043 | -0.733 | -0.141 | 0.047 |
| 16 | u           | 0_1      | 0.285 | 0.478 | 0.485 | -0.465 | -0.076 | -0.096 | -0.041 | -0.724 | -0.141 | 0.047 |
| 17 | u           | 4_3      | 0.285 | 0.479 | 0.491 | -0.470 | -0.099 | -0.076 | -0.043 | -0.731 | -0.131 | 0.046 |
| 18 | u           | 5_1      | 0.284 | 0.469 | 0.495 | -0.512 | -0.060 | -0.010 | -0.092 | -0.707 | -0.140 | 0.022 |
| 19 | u           | 2_1      | 0.282 | 0.462 | 0.484 | -0.544 | -0.045 | -0.735 | -0.019 | -0.041 | -0.142 | 0.043 |
| 20 | f           | 4_0      | 0.282 | 0.362 | 0.479 | -0.562 | -0.022 | -0.017 | -0.048 | -0.736 | -0.036 | 0.043 |
| 21 | f           | 2_4      | 0.286 | 0.482 | 0.488 | -0.508 | -0.003 | -0.094 | -0.060 | -0.712 | -0.148 | 0.019 |
| 22 | d           | 0_1      | 0.266 | 0.462 | 0.495 | -0.549 | -0.040 | -0.031 | -0.733 | -0.030 | -0.142 | 0.056 |
| 23 | f           | 3_1      | 0.268 | 0.484 | 0.496 | -0.477 | -0.060 | -0.734 | -0.034 | -0.103 | -0.140 | 0.048 |
| 24 | f           | 1_0      | 0.272 | 0.474 | 0.502 | -0.507 | -0.095 | -0.706 | -0.029 | -0.043 | -0.142 | 0.029 |
| 25 | u           | 1_5      | 0.265 | 0.477 | 0.522 | -0.532 | 0.005  | -0.042 | -0.091 | -0.755 | -0.152 | 0.045 |
| 26 | u           | 4_1      | 0.285 | 0.466 | 0.498 | -0.504 | -0.125 | -0.010 | -0.037 | -0.723 | -0.140 | 0.046 |
| 27 | f           | 0_5      | 0.274 | 0.449 | 0.476 | -0.558 | -0.043 | -0.019 | -0.709 | -0.032 | -0.139 | 0.038 |
| 28 | d           | 0_4      | 0.284 | 0.357 | 0.478 | -0.419 | -0.097 | -0.101 | -0.083 | -0.737 | 0.012  | 0.037 |
| 29 | u           | 3_4      | 0.286 | 0.459 | 0.375 | -0.394 | -0.115 | -0.126 | -0.065 | -0.735 | 0.011  | 0.039 |
| 30 | u           | 3_2      | 0.285 | 0.457 | 0.375 | -0.402 | -0.105 | -0.082 | -0.112 | -0.731 | -0.000 | 0.052 |
| 31 | f           | 0_3      | 0.290 | 0.345 | 0.522 | -0.437 | -0.719 | -0.080 | -0.027 | -0.126 | -0.031 | 0.024 |
| 32 | f           | 5_1      | 0.290 | 0.346 | 0.521 | -0.422 | -0.081 | -0.140 | -0.028 | -0.716 | -0.034 | 0.025 |
| 33 | d           | 5_4      | 0.292 | 0.452 | 0.371 | -0.437 | -0.070 | -0.078 | -0.111 | -0.731 | 0.014  | 0.033 |
| 34 | d           | 5_0      | 0.294 | 0.453 | 0.370 | -0.414 | -0.083 | -0.097 | -0.103 | -0.723 | 0.004  | 0.043 |
| 35 | d           | 2_0      | 0.293 | 0.359 | 0.474 | -0.402 | -0.084 | -0.093 | -0.129 | -0.723 | 0.003  | 0.042 |
| 36 | d           | 2_4      | 0.294 | 0.350 | 0.470 | -0.426 | -0.100 | -0.061 | -0.112 | -0.717 | 0.006  | 0.040 |
| 37 | u           | 3_0      | 0.291 | 0.487 | 0.364 | -0.413 | -0.079 | -0.721 | -0.056 | -0.123 | -0.028 | 0.035 |
| 38 | u           | 5_0      | 0.291 | 0.489 | 0.363 | -0.421 | -0.031 | -0.713 | -0.080 | -0.138 | -0.036 | 0.033 |
| 39 | u           | 5_3      | 0.294 | 0.495 | 0.365 | -0.440 | -0.017 | -0.722 | -0.089 | -0.127 | -0.026 | 0.027 |
| 40 | u           | 2_0      | 0.297 | 0.455 | 0.375 | -0.388 | -0.102 | -0.121 | -0.094 | -0.720 | 0.006  | 0.039 |
| 41 | u           | 2_4      | 0.297 | 0.358 | 0.473 | -0.445 | -0.080 | -0.068 | -0.114 | -0.722 | -0.007 | 0.053 |
| 42 | f           | 0_4      | 0.296 | 0.361 | 0.474 | -0.399 | -0.117 | -0.071 | -0.119 | -0.727 | 0.008  | 0.038 |
| 43 | u           | 1_0      | 0.276 | 0.504 | 0.370 | -0.426 | -0.112 | -0.090 | -0.051 | -0.719 | -0.031 | 0.029 |
| 44 | f           | 3_0      | 0.296 | 0.455 | 0.381 | -0.404 | -0.092 | -0.120 | -0.092 | -0.727 | 0.005  | 0.041 |
| 45 | u           | 3_1      | 0.295 | 0.459 | 0.376 | -0.398 | -0.093 | -0.707 | -0.117 | -0.100 | 0.002  | 0.027 |
| 46 | f           | 2_1      | 0.295 | 0.358 | 0.505 | -0.405 | -0.068 | -0.709 | -0.077 | -0.134 | -0.029 | 0.024 |
| 47 | f           | 2_5      | 0.266 | 0.468 | 0.488 | -0.560 | -0.048 | -0.032 | -0.012 | -0.729 | -0.139 | 0.050 |
| 48 | f           | 2_0      | 0.297 | 0.359 | 0.473 | -0.396 | -0.116 | -0.082 | -0.114 | -0.721 | 0.011  | 0.035 |
| 49 | f           | 3_4      | 0.265 | 0.363 | 0.494 | -0.502 | -0.696 | -0.059 | -0.093 | -0.034 | -0.026 | 0.045 |
| 50 | u           | 2_3      | 0.291 | 0.490 | 0.363 | -0.425 | -0.031 | -0.715 | -0.079 | -0.135 | -0.034 | 0.032 |

Table S8: Calculated frequencies for group I.

| 5_1     | 2_5     | 4_1     | 0_4     | 4_0     | 4_2     | 4_2     | 4_0     | 0_5     | 3_5     |
|---------|---------|---------|---------|---------|---------|---------|---------|---------|---------|
| d       | u       | f       | u       | d       | u       | f       | u       | u       | f       |
| 3089.73 | 3081.22 | 3077.65 | 3080.85 | 3461.13 | 3528.24 | 3532.31 | 3073.98 | 3531.43 | 3523.9  |
| 3073.32 | 3072.65 | 3076.32 | 3074.14 | 3142.96 | 3151.08 | 3152.18 | 3067.07 | 3144.37 | 3145.03 |
| 2986.91 | 2984.12 | 2985.43 | 2984.23 | 3139.72 | 3130.35 | 3131.97 | 3062.1  | 3129.33 | 3129.57 |
| 2587.98 | 2618.35 | 2627.06 | 2632.45 | 3027.53 | 3024.26 | 3025.96 | 2978.88 | 3022.39 | 3022.93 |
| 2570.81 | 2601.52 | 2613.08 | 2598.5  | 1614.71 | 1683.56 | 1686.79 | 2861.36 | 1796.87 | 1804.49 |
| 1442.52 | 1448.9  | 1444.29 | 1443.77 | 1456.99 | 1455.24 | 1452.67 | 1448.33 | 1455.89 | 1456.48 |

Continued on next page

|         |         |         |         |         |         |         |         |         |         |
|---------|---------|---------|---------|---------|---------|---------|---------|---------|---------|
| 1437.12 | 1442.98 | 1439.98 | 1440.14 | 1425.75 | 1437.8  | 1436.27 | 1441.81 | 1433.89 | 1434.79 |
| 1424.84 | 1427.97 | 1430.01 | 1432.3  | 1421.7  | 1410.74 | 1410.59 | 1431.12 | 1412.93 | 1413.69 |
| 1141.56 | 1151.39 | 1151.53 | 1150.49 | 1271.45 | 1293.37 | 1292.14 | 1156.36 | 1278.34 | 1277.01 |
| 1136.39 | 1144.41 | 1140.02 | 1146.09 | 1150.92 | 1154.78 | 1153.54 | 1146.5  | 1156.46 | 1157.24 |
| 1131.53 | 1128.3  | 1133.16 | 1134.15 | 1141.23 | 1135.35 | 1135.02 | 1100.89 | 1135.63 | 1135.94 |
| 1075.45 | 1069.75 | 1064.36 | 1066.39 | 1098.87 | 1078.15 | 1078.45 | 970.87  | 1059.83 | 1059.18 |
| 1024.66 | 1020.52 | 1025.84 | 1021.89 | 897.38  | 893.94  | 894.45  | 960.86  | 922.95  | 923.52  |
| 976.49  | 966.65  | 972.01  | 969.41  | 782.8   | 749.07  | 748.6   | 822.52  | 747.73  | 751.16  |
| 876.57  | 866.87  | 865.9   | 866.72  | 679.23  | 663.99  | 665.38  | 733.24  | 662.88  | 668.43  |
| 328.08  | 326.01  | 322.79  | 322.99  | 446.45  | 426.12  | 427.11  | 328.06  | 647.46  | 645.81  |
| 306.51  | 303.74  | 301.04  | 301.01  | 332.0   | 320.43  | 321.36  | 288.01  | 412.62  | 410.63  |
| 248.05  | 241.28  | 241.59  | 241.57  | 221.75  | 224.66  | 223.7   | 237.08  | 228.54  | 228.74  |
| 243.71  | 237.92  | 238.22  | 237.73  | 178.03  | 197.16  | 195.35  | 198.26  | 184.07  | 187.31  |
| 166.43  | 170.58  | 173.6   | 170.05  | 165.92  | 167.51  | 161.71  | 146.55  | 147.83  | 150.08  |
| 148.7   | 150.92  | 155.79  | 151.91  | 153.78  | 151.58  | 143.82  | 138.26  | 144.12  | 146.42  |
| 85.5    | 94.98   | 95.12   | 86.02   | 141.04  | 132.95  | 133.62  | 120.66  | 125.43  | 124.62  |
| 57.2    | 75.16   | 66.47   | 51.7    | 117.57  | 117.27  | 116.2   | 83.71   | 108.68  | 114.3   |
| 30.26   | 71.52   | 61.1    | 36.33   | 106.33  | 102.14  | 103.53  | 48.02   | 93.52   | 96.13   |
| 17.8    | 50.34   | 31.69   | 8.83    | 99.06   | 99.91   | 98.16   | 27.84i  | 92.09   | 89.1    |
| 33.35i  | 33.02   | 15.19   | 16.33i  | 49.18   | 56.58   | 63.69   | 42.83i  | 45.25   | 44.9    |
| 53.58i  | 29.45i  | 35.85i  | 65.41i  | 37.03   | 35.89   | 49.94   | 50.5i   | 40.5    | 43.09   |
| 4_1     | 0_1     | 4_5     | 1_3     | 4_3     | 0_1     | 4_3     | 5_1     | 2_1     | 4_0     |
| d       | f       | f       | f       | f       | u       | u       | u       | u       | f       |
| 3391.67 | 3486.39 | 3388.38 | 3392.74 | 3391.02 | 3388.9  | 3395.01 | 3449.64 | 3428.95 | 3444.21 |
| 3137.25 | 3142.97 | 3131.38 | 3133.82 | 3135.03 | 3137.31 | 3140.03 | 3146.17 | 3082.03 | 3084.25 |
| 3122.5  | 3135.93 | 3116.49 | 3119.58 | 3121.75 | 3122.04 | 3124.03 | 3111.75 | 3069.23 | 3070.18 |
| 3016.36 | 3026.87 | 3011.08 | 3013.8  | 3015.79 | 3016.2  | 3018.27 | 3012.13 | 2982.54 | 2983.38 |
| 1961.57 | 1780.29 | 2014.40 | 1999.8  | 2008.45 | 1998.13 | 1991.19 | 2025.79 | 1882.29 | 1904.96 |
| 1452.62 | 1457.36 | 1453.93 | 1455.17 | 1454.55 | 1454.99 | 1452.85 | 1444.9  | 1448.56 | 1448.94 |
| 1436.43 | 1426.07 | 1442.39 | 1438.36 | 1437.61 | 1436.47 | 1432.13 | 1427.62 | 1442.02 | 1438.22 |
| 1415.96 | 1420.41 | 1417.26 | 1417.07 | 1416.34 | 1415.73 | 1416.22 | 1425.45 | 1425.7  | 1428.45 |
| 1237.47 | 1259.07 | 1229.53 | 1232.59 | 1231.11 | 1233.05 | 1233.96 | 1221.9  | 1191.13 | 1196.48 |
| 1161.73 | 1151.91 | 1164.73 | 1162.27 | 1161.45 | 1160.55 | 1157.08 | 1149.03 | 1149.8  | 1153.96 |
| 1140.98 | 1141.46 | 1138.89 | 1140.36 | 1139.94 | 1139.97 | 1143.71 | 1146.12 | 1144.86 | 1145.04 |
| 1054.74 | 1082.55 | 1047.49 | 1049.69 | 1047.35 | 1049.2  | 1049.54 | 1047.31 | 1099.01 | 1089.72 |
| 911.25  | 928.67  | 912.24  | 912.71  | 912.52  | 912.58  | 911.72  | 911.99  | 968.77  | 966.98  |
| 861.17  | 761.85  | 859.04  | 857.28  | 858.89  | 862.42  | 862.12  | 797.6   | 759.98  | 740.26  |
| 605.08  | 670.06  | 599.74  | 601.14  | 601.03  | 604.9   | 606.24  | 616.43  | 618.26  | 608.47  |
| 382.25  | 650.43  | 371.97  | 372.69  | 371.72  | 371.33  | 372.18  | 378.37  | 363.58  | 366.16  |
| 312.0   | 422.63  | 309.29  | 309.43  | 308.74  | 312.85  | 315.55  | 272.43  | 249.73  | 239.82  |
| 262.85  | 227.09  | 250.49  | 252.69  | 251.06  | 252.49  | 253.38  | 265.48  | 231.33  | 225.99  |
| 223.52  | 183.13  | 217.45  | 216.76  | 217.58  | 217.72  | 221.45  | 214.88  | 173.43  | 167.74  |
| 167.44  | 168.81  | 160.05  | 159.24  | 160.14  | 160.49  | 160.32  | 153.98  | 160.63  | 157.71  |
| 133.14  | 150.35  | 138.87  | 144.65  | 137.44  | 138.91  | 145.19  | 147.44  | 127.84  | 131.9   |
| 102.78  | 125.38  | 102.74  | 106.41  | 103.32  | 107.61  | 116.34  | 138.4   | 124.0   | 112.73  |
| 98.18   | 111.71  | 99.62   | 99.46   | 96.06   | 96.89   | 104.92  | 101.65  | 73.61   | 94.55   |
| 70.72   | 106.23  | 88.51   | 89.72   | 82.36   | 89.86   | 90.02   | 91.11   | 61.54   | 53.82   |

Continued on next page

|         |         |         |         |         |         |         |         |         |         |
|---------|---------|---------|---------|---------|---------|---------|---------|---------|---------|
| 62.45   | 91.07   | 63.12   | 75.53   | 70.83   | 71.41   | 73.7    | 65.92   | 50.94   | 43.73   |
| 54.93   | 54.18   | 47.57   | 53.36   | 50.89   | 54.17   | 58.07   | 28.34   | 11.76i  | 22.48   |
| 19.32i  | 48.59   | 36.80   | 37.03   | 32.64   | 10.7    | 35.82   | 20.9    | 17.7i   | 13.26i  |
| 2_4     | 0_1     | 3_1     | 1_0     | 1_5     | 4_1     | 0_5     | 0_4     | 3_4     | 3_2     |
| f       | d       | f       | f       | u       | u       | f       | d       | u       | u       |
| 3520.59 | 3200.51 | 3485.21 | 3471.29 | 3566.13 | 3462.73 | 3075.6  | 3185.38 | 3183.89 | 3186.33 |
| 3127.49 | 3081.46 | 3144.79 | 3126.14 | 3125.97 | 3138.16 | 3072.16 | 3161.63 | 3162.55 | 3172.11 |
| 3103.8  | 3078.21 | 3108.36 | 3114.69 | 3088.08 | 3103.99 | 2982.3  | 3046.03 | 3045.42 | 3051.71 |
| 3006.94 | 2986.92 | 3010.85 | 3008.76 | 2998.98 | 3006.6  | 2608.66 | 2896.88 | 2886.41 | 2871.84 |
| 2123.33 | 1806.95 | 2140.16 | 2084.23 | 2229.21 | 2042.25 | 2597.68 | 2594.06 | 2513.93 | 2546.5  |
| 1454.77 | 1440.05 | 1442.61 | 1456.16 | 1445.0  | 1443.86 | 1442.18 | 1452.51 | 1451.89 | 1450.2  |
| 1433.01 | 1436.82 | 1430.06 | 1430.8  | 1430.04 | 1431.57 | 1440.65 | 1423.94 | 1420.37 | 1416.94 |
| 1423.52 | 1426.77 | 1424.63 | 1419.62 | 1422.81 | 1428.49 | 1429.38 | 1407.51 | 1405.43 | 1405.15 |
| 1215.51 | 1281.66 | 1227.52 | 1210.14 | 1191.03 | 1230.83 | 1150.13 | 1158.73 | 1160.07 | 1155.53 |
| 1151.69 | 1148.08 | 1148.92 | 1151.34 | 1154.07 | 1153.46 | 1143.55 | 1128.07 | 1127.23 | 1127.39 |
| 1140.34 | 1141.24 | 1139.18 | 1148.48 | 1142.59 | 1144.75 | 1134.36 | 1058.55 | 1072.29 | 1060.15 |
| 1021.34 | 1124.35 | 1015.51 | 1018.31 | 1005.58 | 1022.75 | 1071.08 | 961.35  | 959.1   | 960.75  |
| 923.31  | 965.38  | 902.38  | 906.45  | 944.34  | 901.15  | 1023.12 | 944.21  | 947.99  | 953.38  |
| 707.54  | 896.31  | 793.68  | 847.54  | 677.69  | 848.59  | 970.09  | 822.68  | 832.31  | 828.55  |
| 555.07  | 704.43  | 632.93  | 650.97  | 630.61  | 578.88  | 868.97  | 788.33  | 790.49  | 785.31  |
| 357.14  | 628.63  | 593.83  | 607.77  | 541.8   | 371.73  | 321.81  | 522.59  | 520.7   | 523.14  |
| 278.54  | 384.28  | 345.18  | 360.47  | 348.25  | 272.62  | 298.83  | 301.38  | 298.72  | 304.03  |
| 246.52  | 245.09  | 234.15  | 261.01  | 253.94  | 246.26  | 243.96  | 267.17  | 273.64  | 273.03  |
| 188.94  | 181.37  | 198.37  | 173.13  | 162.41  | 204.77  | 233.08  | 202.04  | 204.53  | 207.0   |
| 156.89  | 130.19  | 156.21  | 152.7   | 147.07  | 160.91  | 171.23  | 177.67  | 166.56  | 181.62  |
| 133.02  | 100.59  | 145.2   | 136.95  | 130.88  | 136.49  | 154.95  | 156.56  | 157.36  | 163.41  |
| 107.75  | 92.3    | 128.09  | 115.68  | 100.31  | 126.79  | 87.71   | 151.08  | 152.34  | 157.56  |
| 79.48   | 52.9    | 106.37  | 102.18  | 95.89   | 87.24   | 54.48   | 130.76  | 128.78  | 132.93  |
| 71.77   | 46.21   | 85.87   | 85.55   | 58.74   | 76.96   | 46.41   | 122.16  | 116.73  | 121.81  |
| 68.49   | 21.17i  | 68.16   | 44.78   | 41.42   | 45.25   | 22.45   | 110.65  | 108.19  | 112.56  |
| 43.96   | 24.5i   | 27.01   | 37.55   | 35.37   | 6.35    | 21.73   | 59.83   | 70.29   | 54.63   |
| 30.45i  | 64.6i   | 25.33   | 34.76i  | 47.45i  | 36.9i   | 31.43i  | 41.38   | 32.81   | 12.56   |
| 0_3     | 5_1     | 5_4     | 5_0     | 2_0     | 2_4     | 3_0     | 5_0     | 5_3     | 2_0     |
| f       | f       | d       | d       | d       | d       | u       | u       | u       | u       |
| 3185.08 | 3186.67 | 3174.36 | 3169.59 | 3183.81 | 3171.02 | 3188.72 | 3189.9  | 3184.98 | 3184.96 |
| 3140.92 | 3141.66 | 3159.51 | 3157.83 | 3158.62 | 3160.34 | 3141.84 | 3142.69 | 3143.31 | 3162.93 |
| 3100.34 | 3097.6  | 3044.69 | 3041.71 | 3058.59 | 3048.75 | 3059.68 | 3067.27 | 3059.66 | 3067.5  |
| 3027.22 | 3027.89 | 3009.41 | 3001.66 | 3037.07 | 3027.5  | 3024.33 | 3026.3  | 3024.45 | 3042.57 |
| 2757.4  | 2749.28 | 2242.75 | 2239.05 | 2317.39 | 2210.46 | 2704.57 | 2712.48 | 2705.57 | 2235.11 |
| 1458.11 | 1457.96 | 1450.59 | 1454.05 | 1454.49 | 1453.63 | 1456.49 | 1457.31 | 1456.42 | 1452.93 |
| 1432.2  | 1432.1  | 1418.83 | 1418.89 | 1406.61 | 1414.06 | 1434.72 | 1434.24 | 1434.66 | 1405.91 |
| 1395.33 | 1394.48 | 1407.77 | 1406.71 | 1402.51 | 1405.5  | 1393.01 | 1392.32 | 1395.72 | 1400.38 |
| 1183.47 | 1185.07 | 1191.53 | 1191.28 | 1159.06 | 1195.31 | 1197.19 | 1196.27 | 1195.13 | 1161.72 |
| 1137.76 | 1136.73 | 1138.43 | 1140.94 | 1129.68 | 1140.22 | 1133.92 | 1134.77 | 1135.59 | 1128.54 |
| 1113.61 | 1113.17 | 1125.11 | 1125.66 | 1074.67 | 1125.16 | 1111.38 | 1110.55 | 1111.48 | 1081.86 |
| 887.41  | 888.86  | 942.07  | 943.44  | 983.89  | 932.5   | 902.69  | 902.98  | 900.23  | 1006.0  |
| 850.37  | 850.93  | 914.29  | 917.59  | 940.5   | 923.76  | 857.4   | 852.83  | 856.5   | 933.5   |

Continued on next page

|         |         |         |         |         |         |         |         |         |         |
|---------|---------|---------|---------|---------|---------|---------|---------|---------|---------|
| 832.72  | 834.81  | 908.9   | 909.78  | 898.73  | 909.58  | 837.21  | 834.09  | 836.11  | 893.47  |
| 802.45  | 803.36  | 824.37  | 824.22  | 793.98  | 824.23  | 801.26  | 799.87  | 798.44  | 796.19  |
| 478.86  | 482.46  | 497.1   | 496.77  | 492.96  | 491.26  | 433.09  | 431.09  | 428.69  | 494.01  |
| 371.11  | 373.46  | 308.88  | 309.16  | 310.83  | 313.9   | 329.74  | 327.55  | 324.79  | 302.76  |
| 272.21  | 274.85  | 294.58  | 294.51  | 288.53  | 298.55  | 241.43  | 239.55  | 240.74  | 290.89  |
| 221.95  | 221.82  | 171.24  | 169.06  | 166.08  | 168.24  | 205.51  | 204.09  | 197.24  | 169.96  |
| 174.87  | 173.01  | 144.94  | 141.9   | 138.21  | 142.59  | 158.61  | 158.32  | 152.85  | 141.98  |
| 143.29  | 139.84  | 134.43  | 133.49  | 125.09  | 135.14  | 149.35  | 146.12  | 149.94  | 122.04  |
| 117.57  | 118.09  | 115.1   | 110.84  | 114.06  | 112.8   | 123.46  | 120.48  | 115.18  | 112.38  |
| 99.97   | 98.13   | 96.21   | 100.32  | 100.43  | 89.56   | 107.23  | 101.48  | 99.25   | 102.16  |
| 79.65   | 83.24   | 82.45   | 81.08   | 96.79   | 83.21   | 83.34   | 83.3    | 77.49   | 88.93   |
| 59.97   | 57.59   | 62.72   | 69.05   | 79.04   | 73.83   | 60.03   | 56.78   | 60.38   | 79.75   |
| 42.14   | 41.18   | 41.75   | 32.19   | 45.31   | 48.27   | 42.71   | 41.36   | 17.84   | 46.38   |
| 27.58   | 18.55   | 15.03i  | 13.56   | 27.2    | 27.7    | 33.2    | 22.69   | 23.79i  | 34.73   |
| 2_4     | 0_4     | 1_0     | 3_0     | 3_1     | 2_1     | 2_5     | 2_0     | 3_4     | 2_3     |
| u       | f       | u       | f       | u       | f       | f       | f       | f       | u       |
| 3184.57 | 3185.65 | 3204.34 | 3186.61 | 3195.5  | 3754.14 | 3283.45 | 3185.49 | 3554.09 | 3187.22 |
| 3161.93 | 3161.59 | 3168.14 | 3161.42 | 3185.64 | 3289.09 | 3084.86 | 3162.37 | 3149.42 | 3140.8  |
| 3065.76 | 3049.32 | 3042.63 | 3050.64 | 3143.29 | 3150.62 | 3075.37 | 3064.57 | 3140.76 | 3067.3  |
| 3041.76 | 3026.85 | 3007.01 | 3029.34 | 3059.36 | 3132.33 | 2986.6  | 3041.98 | 3031.48 | 3024.32 |
| 2239.49 | 2295.64 | 2638.24 | 2287.97 | 2252.54 | 3015.59 | 1924.03 | 2242.91 | 1788.21 | 2712.82 |
| 1453.16 | 1455.11 | 1439.52 | 1453.38 | 1439.3  | 1461.47 | 1445.22 | 1453.9  | 1440.97 | 1456.79 |
| 1406.29 | 1404.03 | 1429.13 | 1404.04 | 1410.98 | 1453.91 | 1438.72 | 1407.24 | 1432.93 | 1433.35 |
| 1401.55 | 1403.14 | 1393.75 | 1401.36 | 1395.34 | 1412.38 | 1427.48 | 1399.86 | 1409.77 | 1392.76 |
| 1161.38 | 1160.65 | 1195.33 | 1162.25 | 1154.55 | 1154.43 | 1267.55 | 1162.34 | 1270.45 | 1195.81 |
| 1127.67 | 1126.39 | 1120.18 | 1125.72 | 1129.18 | 1111.35 | 1151.59 | 1129.86 | 1147.76 | 1135.45 |
| 1081.45 | 1079.88 | 1116.84 | 1080.71 | 1089.07 | 844.8   | 1143.6  | 1084.55 | 1133.03 | 1111.29 |
| 1003.79 | 986.39  | 865.12  | 989.98  | 998.13  | 815.59  | 1107.18 | 999.75  | 1059.92 | 902.28  |
| 935.4   | 948.86  | 855.7   | 945.9   | 925.09  | 725.15  | 966.18  | 934.64  | 935.58  | 851.49  |
| 894.75  | 907.0   | 844.98  | 905.61  | 865.76  | 574.03  | 869.45  | 896.58  | 742.37  | 832.8   |
| 796.42  | 790.95  | 810.23  | 789.12  | 787.87  | 523.84  | 665.65  | 797.24  | 666.77  | 798.49  |
| 493.77  | 493.51  | 459.7   | 493.09  | 487.23  | 422.4   | 569.15  | 494.96  | 631.36  | 431.5   |
| 300.54  | 307.05  | 341.68  | 305.35  | 304.7   | 253.96  | 368.36  | 301.76  | 422.16  | 327.48  |
| 287.41  | 288.7   | 235.31  | 290.68  | 294.25  | 193.13  | 223.14  | 288.99  | 224.41  | 238.14  |
| 164.2   | 164.13  | 204.41  | 164.39  | 163.84  | 174.23  | 180.56  | 166.23  | 172.3   | 203.34  |
| 139.55  | 144.08  | 147.09  | 148.92  | 151.94  | 141.55  | 129.2   | 141.09  | 139.5   | 157.42  |
| 124.42  | 129.87  | 132.22  | 131.0   | 123.78  | 115.93  | 104.16  | 119.96  | 132.29  | 144.35  |
| 120.63  | 114.33  | 124.45  | 109.11  | 106.21  | 98.47   | 97.48   | 109.22  | 120.07  | 120.15  |
| 98.53   | 104.03  | 92.96   | 96.52   | 96.54   | 83.51   | 62.04   | 100.16  | 102.3   | 103.2   |
| 87.69   | 94.5    | 60.34   | 86.21   | 77.64   | 74.27   | 54.48   | 85.29   | 91.62   | 82.09   |
| 73.77   | 74.87   | 44.92   | 71.01   | 41.17   | 47.65   | 49.36   | 76.49   | 58.77   | 53.45   |
| 28.91   | 43.15   | 34.4    | 52.8    | 31.77   | 26.72   | 33.91   | 46.5    | 37.14   | 38.52   |
| 15.79   | 22.75   | 33.58i  | 27.76   | 137.59i | 7.37i   | 32.03i  | 21.37   | 34.24i  | 21.94   |

## 2.2 Group 2

Table S9: Adsorption energies and bond distances for the adsorbed structures in group II.

| # | Orientation | Position | E <sub>ads</sub> | d(CH) | d(CH) | d(CF) | d(CF) | d(NiF) | d(NiF) | d(HF) | d(HH) |
|---|-------------|----------|------------------|-------|-------|-------|-------|--------|--------|-------|-------|
| 1 | u           | 1_4      | -9.1177          | 1.092 | 1.094 | 1.369 | 1.421 | 2.063  | 2.194  | 1.047 | 0.752 |
| 2 | u           | 0_3      | -9.0037          | 1.094 | 1.095 | 1.370 | 1.416 | 2.176  | 2.355  | 1.039 | 0.752 |
| 3 | d           | 2_1      | -8.9944          | 1.093 | 1.096 | 1.370 | 1.417 | 2.043  | 2.222  | 1.041 | 0.751 |
| 4 | f           | 1_5      | -7.0577          | 1.095 | 1.095 | 1.357 | 1.452 | 1.830  | 2.860  | 1.010 | 0.752 |

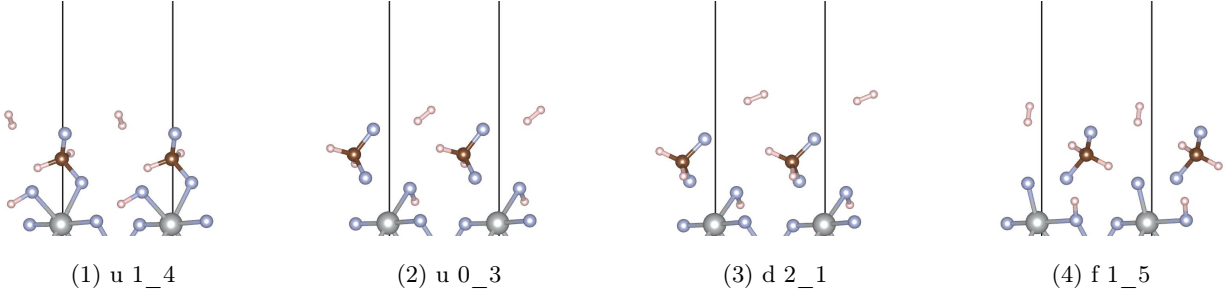

Figure S3: Adsorbed structures belonging to group II.

Table S10: Magnetic moments on the surface nickel, fluorine and on the adsorbates for group II.

| # | Orientation | Position | Ni     | F      | F      | C      | H      | H      | H      | H      | F      | H      |
|---|-------------|----------|--------|--------|--------|--------|--------|--------|--------|--------|--------|--------|
| 1 | u           | 1_4      | -1.827 | -0.012 | -0.022 | -0.000 | -0.000 | -0.000 | -0.000 | -0.000 | -0.000 | -0.000 |
| 2 | u           | 0_3      | -1.830 | -0.000 | -0.009 | -0.000 | -0.000 | -0.000 | -0.000 | -0.000 | -0.019 | -0.000 |
| 3 | d           | 2_1      | -1.829 | -0.023 | -0.009 | -0.001 | -0.000 | -0.000 | -0.000 | -0.000 | -0.000 | -0.001 |
| 4 | f           | 1_5      | -1.816 | -0.002 | -0.059 | 0.000  | 0.000  | 0.000  | 0.000  | -0.000 | -0.000 | -0.000 |

Table S11: Charge transfer for the surface nickel, fluorine and the adsorbates for group II.

| # | Orientation | Position | Ni    | F     | F     | C      | H      | H      | H      | H      | F      | H     |
|---|-------------|----------|-------|-------|-------|--------|--------|--------|--------|--------|--------|-------|
| 1 | u           | 1_4      | 0.282 | 0.343 | 0.494 | -1.099 | -0.071 | 0.022  | 0.007  | -0.113 | -0.157 | 0.041 |
| 2 | u           | 0_3      | 0.274 | 0.348 | 0.362 | -1.056 | -0.715 | 0.011  | 0.018  | -0.108 | -0.020 | 0.638 |
| 3 | d           | 2_1      | 0.274 | 0.464 | 0.372 | -1.063 | -0.005 | -0.086 | 0.036  | -0.140 | -0.152 | 0.044 |
| 4 | f           | 1_5      | 0.319 | 0.347 | 0.465 | -1.031 | -0.726 | -0.167 | -0.104 | -0.002 | -0.148 | 0.783 |

Table S12: Calculated frequencies for group II

| 1_4     | 0_3     | 2_1     | 1_5     |
|---------|---------|---------|---------|
| u       | u       | d       | f       |
| 4270.63 | 4273.81 | 4302.96 | 4264.3  |
| 3151.92 | 3139.79 | 3140.79 | 3137.66 |
| 3052.38 | 3042.85 | 3038.53 | 3033.42 |
| 2131.67 | 2238.94 | 2210.16 | 2714.56 |
| 1451.06 | 1452.43 | 1470.87 | 1473.6  |
| 1383.83 | 1388.61 | 1387.76 | 1388.07 |
| 1212.99 | 1216.33 | 1215.0  | 1216.32 |

Continued on next page

|         |         |         |         |
|---------|---------|---------|---------|
| 1194.47 | 1180.37 | 1194.0  | 1115.41 |
| 1125.26 | 1127.56 | 1135.43 | 1099.02 |
| 1073.81 | 1069.66 | 1066.55 | 927.25  |
| 1032.24 | 1012.73 | 1031.55 | 874.22  |
| 919.97  | 938.65  | 920.71  | 813.03  |
| 495.82  | 625.8   | 491.26  | 484.92  |
| 363.82  | 473.96  | 359.08  | 463.12  |
| 253.95  | 326.19  | 259.11  | 321.7   |
| 241.48  | 232.99  | 223.12  | 257.34  |
| 224.24  | 197.63  | 183.91  | 240.91  |
| 215.33  | 189.68  | 171.91  | 179.29  |
| 169.7   | 157.01  | 162.35  | 171.52  |
| 153.67  | 143.45  | 155.13  | 130.42  |
| 146.55  | 138.2   | 132.18  | 112.89  |
| 116.38  | 91.74   | 108.57  | 104.52  |
| 95.77   | 75.79   | 93.5    | 77.13   |
| 84.91   | 66.75   | 85.48   | 65.25   |
| 74.97   | 59.15   | 62.41   | 41.9    |
| 60.02   | 28.38   | 51.6    | 10.56   |
| 42.83   | 17.01i  | 37.84   | 19.9i   |

## 2.3 Group 3

Table S13: Adsorption energies and bond distances for the adsorbed structures in group III.

| # | Orientation | Position | E <sub>ads</sub> | d(CH) | d(CH) | d(CH) | d(NiF) | d(NiF) | d(HF) | d(HF) |
|---|-------------|----------|------------------|-------|-------|-------|--------|--------|-------|-------|
| 1 | u           | 5_4      | -3.2646          | 1.089 | 1.089 | 1.092 | 1.775  | 2.063  | 0.976 | 0.994 |
| 2 | f           | 5_0      | -3.2623          | 1.089 | 1.089 | 1.091 | 1.774  | 2.061  | 0.976 | 0.995 |
| 3 | f           | 5_4      | -3.2569          | 1.089 | 1.089 | 1.092 | 1.774  | 2.060  | 0.975 | 0.992 |
| 4 | f           | 1_4      | -2.5749          | 1.089 | 1.089 | 1.092 | 1.774  | 2.062  | 0.976 | 0.995 |
| 5 | u           | 3_5      | -2.3095          | 1.089 | 1.090 | 1.093 | 1.777  | 2.066  | 0.975 | 1.013 |

Table S14: Magnetic moments on the surface nickel, fluorine and on the adsorbates for group III.

| # | Orientation | Position | Ni     | F      | F      | C      | H      | H      | H      | H      | F      | H      |
|---|-------------|----------|--------|--------|--------|--------|--------|--------|--------|--------|--------|--------|
| 1 | u           | 5_4      | -2.227 | -0.039 | -0.237 | 0.264  | 0.027  | -0.004 | -0.004 | -0.005 | 0.070  | -0.000 |
| 2 | f           | 5_0      | -2.227 | -0.039 | -0.237 | 0.263  | 0.027  | -0.004 | -0.004 | -0.004 | -0.000 | 0.072  |
| 3 | f           | 5_4      | -2.230 | -0.245 | -0.040 | -0.268 | 0.004  | -0.026 | 0.004  | 0.005  | -0.000 | -0.072 |
| 4 | f           | 1_4      | -2.227 | -0.236 | -0.039 | 0.263  | -0.004 | 0.027  | -0.004 | -0.005 | -0.000 | 0.071  |
| 5 | u           | 3_5      | -2.223 | -0.039 | -0.238 | -0.005 | -0.000 | 0.000  | -0.000 | -0.001 | -0.002 | -0.000 |

Table S15: Charge transfer for the surface nickel, fluorine and the adsorbates for group III.

| # | Orientation | Position | Ni    | F     | F     | C     | H      | H      | H      | H      | F      | H     |
|---|-------------|----------|-------|-------|-------|-------|--------|--------|--------|--------|--------|-------|
| 1 | u           | 5_4      | 0.002 | 0.439 | 0.323 | 0.153 | -0.641 | -0.078 | -0.033 | -0.165 | -0.046 | 0.032 |

Continued on next page

| # | Orientation | Position | Ni     | F     | F     | C     | H      | H      | H      | H      | F      | H     |
|---|-------------|----------|--------|-------|-------|-------|--------|--------|--------|--------|--------|-------|
| 2 | f           | 5_0      | 0.002  | 0.453 | 0.323 | 0.151 | -0.622 | -0.067 | -0.051 | -0.159 | -0.063 | 0.019 |
| 3 | f           | 5_4      | -0.000 | 0.304 | 0.469 | 0.116 | -0.045 | -0.627 | -0.044 | -0.143 | -0.062 | 0.021 |
| 4 | f           | 1_4      | 0.002  | 0.305 | 0.470 | 0.141 | -0.069 | -0.625 | -0.051 | -0.146 | -0.060 | 0.020 |
| 5 | u           | 3_5      | 0.004  | 0.452 | 0.323 | 0.116 | -0.576 | -0.050 | -0.071 | -0.146 | -0.088 | 0.022 |

Table S16: Calculated frequencies for group III

| 5_4     | 5_0     | 5_4     | 1_4     | 3_5     |
|---------|---------|---------|---------|---------|
| u       | f       | f       | f       | u       |
| 3276.97 | 3271.02 | 3284.45 | 3277.16 | 3258.19 |
| 3204.32 | 3206.17 | 3202.34 | 3204.76 | 3204.36 |
| 3189.74 | 3195.09 | 3188.03 | 3191.48 | 3183.48 |
| 3017.98 | 3022.37 | 3017.04 | 3019.4  | 3007.71 |
| 2830.64 | 2805.98 | 2856.17 | 2813.42 | 2465.13 |
| 1369.46 | 1368.04 | 1372.91 | 1369.91 | 1367.38 |
| 1357.21 | 1357.41 | 1354.8  | 1356.85 | 1357.61 |
| 1000.55 | 1009.57 | 996.72  | 1006.71 | 992.86  |
| 839.86  | 842.76  | 832.14  | 840.47  | 901.01  |
| 771.59  | 774.57  | 774.66  | 772.67  | 754.87  |
| 648.19  | 658.83  | 638.79  | 655.96  | 678.62  |
| 582.51  | 585.1   | 577.22  | 583.72  | 602.88  |
| 495.49  | 496.65  | 498.7   | 495.93  | 480.24  |
| 337.59  | 338.06  | 339.13  | 337.8   | 380.35  |
| 315.4   | 316.93  | 308.61  | 314.84  | 333.22  |
| 259.51  | 268.36  | 264.1   | 265.46  | 270.35  |
| 246.91  | 250.34  | 252.24  | 250.78  | 238.99  |
| 240.45  | 241.89  | 239.56  | 242.48  | 219.14  |
| 175.04  | 177.56  | 179.38  | 176.54  | 177.41  |
| 172.26  | 171.49  | 177.39  | 171.67  | 161.06  |
| 143.75  | 141.14  | 148.53  | 142.46  | 140.88  |
| 137.77  | 139.91  | 138.71  | 137.68  | 131.28  |
| 115.57  | 117.39  | 115.43  | 117.3   | 108.93  |
| 93.12   | 93.78   | 102.06  | 96.17   | 98.88   |
| 75.36   | 76.26   | 92.44   | 77.79   | 57.79   |
| 43.68   | 50.79   | 55.54   | 50.04   | 40.99   |
| 24.43   | 42.36   | 27.29   | 39.03   | 4.48    |

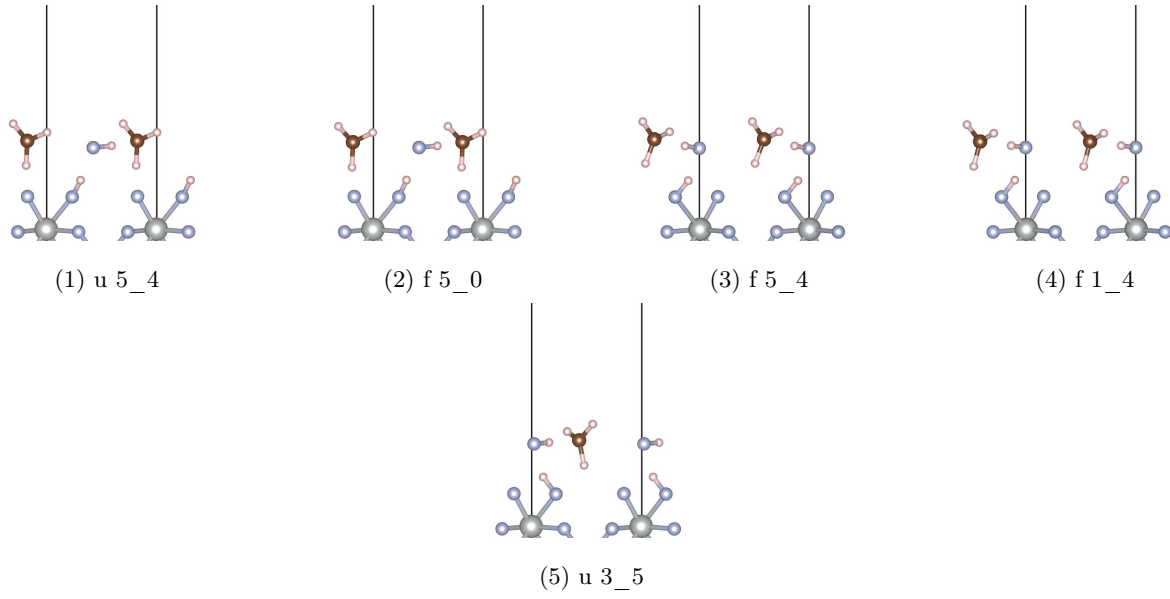

Figure S4: Adsorbed structures belonging to group III.

## 2.4 Group 4

Table S17: Adsorption energies and bond distances for the adsorbed structures in group IV.

| #  | Orientation | Position | $E_{\text{ads}}$ | d(CH) | d(CH) | d(CH) | d(CH) | d(NiF) | d(NiF) | d(HF) |
|----|-------------|----------|------------------|-------|-------|-------|-------|--------|--------|-------|
| 1  | d           | 1_5      | -1.4193          | 1.096 | 1.096 | 1.096 | 1.097 | 1.837  | 1.930  | 1.076 |
| 2  | f           | 5_3      | -1.3821          | 1.096 | 1.096 | 1.097 | 1.097 | 1.836  | 1.945  | 1.058 |
| 3  | u           | 0_2      | -0.9983          | 1.095 | 1.096 | 1.099 | 1.099 | 1.705  | 1.710  | 0.950 |
| 4  | f           | 3_2      | -0.8739          | 1.095 | 1.095 | 1.096 | 1.111 | 1.779  | 1.926  | 0.977 |
| 5  | d           | 2_5      | -0.7621          | 1.095 | 1.095 | 1.096 | 1.110 | 1.839  | 1.843  | 0.972 |
| 6  | d           | 1_2      | -0.7281          | 1.095 | 1.096 | 1.099 | 1.099 | 1.866  | 1.896  | 0.949 |
| 7  | f           | 5_2      | -0.7279          | 1.095 | 1.096 | 1.099 | 1.099 | 1.870  | 1.892  | 0.948 |
| 8  | d           | 5_2      | -0.7272          | 1.095 | 1.096 | 1.099 | 1.099 | 1.876  | 1.885  | 0.949 |
| 9  | d           | 4_2      | -0.7155          | 1.095 | 1.096 | 1.099 | 1.099 | 1.874  | 1.889  | 0.948 |
| 10 | d           | 0_2      | -0.7058          | 1.095 | 1.096 | 1.099 | 1.099 | 1.875  | 1.887  | 0.948 |
| 11 | d           | 1_3      | -0.7049          | 1.095 | 1.096 | 1.098 | 1.099 | 1.872  | 1.889  | 0.948 |
| 12 | d           | 2_3      | -0.7027          | 1.096 | 1.098 | 1.098 | 1.100 | 1.874  | 1.881  | 0.949 |
| 13 | d           | 5_3      | -0.6988          | 1.096 | 1.096 | 1.100 | 1.100 | 1.866  | 1.889  | 0.949 |
| 14 | f           | 2_3      | -0.6937          | 1.096 | 1.096 | 1.099 | 1.099 | 1.866  | 1.889  | 0.949 |
| 15 | d           | 1_4      | -0.6909          | 1.094 | 1.096 | 1.100 | 1.100 | 1.868  | 1.887  | 0.949 |
| 16 | d           | 4_3      | -0.6859          | 1.095 | 1.096 | 1.099 | 1.099 | 1.875  | 1.888  | 0.948 |
| 17 | d           | 3_2      | -0.6856          | 1.095 | 1.096 | 1.098 | 1.098 | 1.834  | 1.941  | 0.948 |
| 18 | d           | 3_5      | -0.6842          | 1.096 | 1.096 | 1.099 | 1.100 | 1.863  | 1.894  | 0.949 |
| 19 | d           | 3_4      | -0.6829          | 1.096 | 1.098 | 1.098 | 1.100 | 1.876  | 1.881  | 0.949 |
| 20 | u           | 4_5      | -0.6797          | 1.095 | 1.096 | 1.098 | 1.099 | 1.866  | 1.899  | 0.947 |
| 21 | d           | 0_3      | -0.6742          | 1.095 | 1.096 | 1.099 | 1.099 | 1.879  | 1.883  | 0.948 |
| 22 | d           | 3_0      | -0.6705          | 1.095 | 1.098 | 1.099 | 1.100 | 1.874  | 1.882  | 0.949 |
| 23 | d           | 1_0      | -0.6703          | 1.096 | 1.096 | 1.099 | 1.100 | 1.867  | 1.889  | 0.949 |
| 24 | u           | 1_2      | -0.5754          | 1.095 | 1.096 | 1.099 | 1.100 | 1.814  | 1.919  | 0.951 |
| 25 | f           | 1_2      | -0.5744          | 1.095 | 1.096 | 1.099 | 1.099 | 1.815  | 1.920  | 0.950 |
| 26 | u           | 5_2      | -0.1752          | 1.095 | 1.096 | 1.099 | 1.100 | 1.781  | 1.994  | 0.950 |



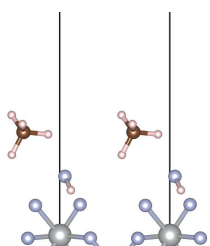

(1) d 1\_5

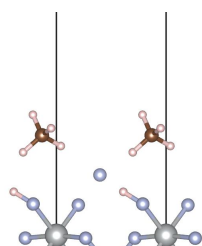

(2) f 5\_3

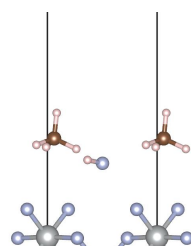

(3) u 0\_2

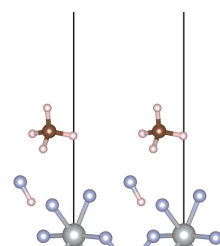

(4) f 3\_2

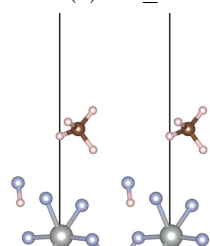

(5) d 2\_5

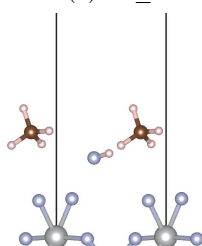

(6) d 1\_2

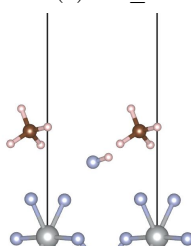

(7) f 5\_2

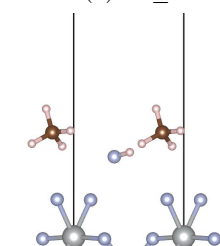

(8) d 5\_2

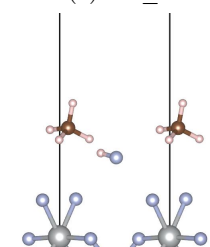

(9) d 4\_2

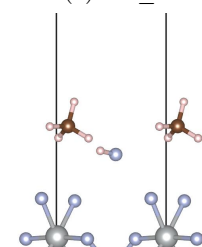

(10) d 0\_2

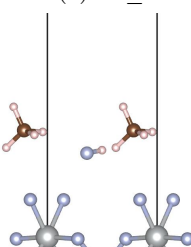

(11) d 1\_3

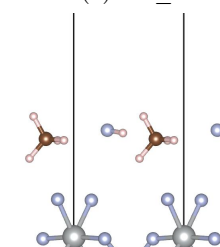

(12) d 2\_3

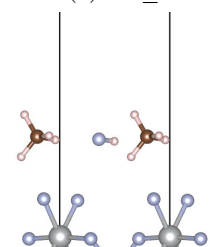

(13) d 5\_3

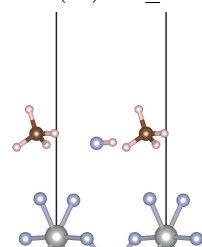

(14) f 2\_3

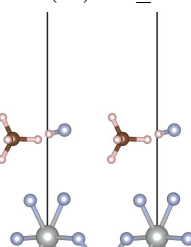

(15) d 1\_4

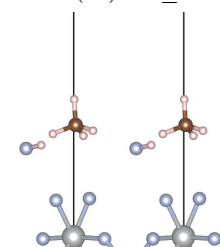

(16) d 4\_3

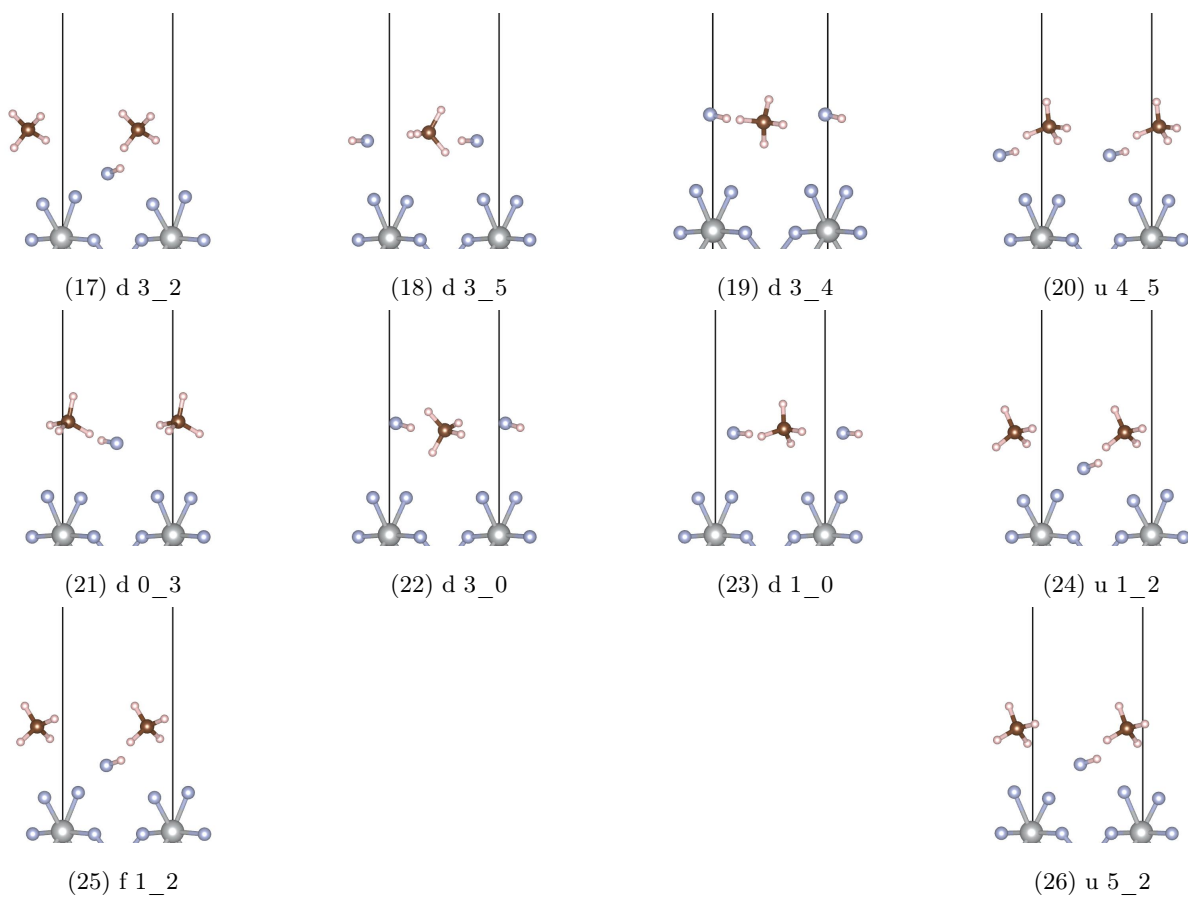

Figure S5: Adsorbed structures belonging to group IV.

Table S18: Magnetic moments on the surface nickel, fluorine and on the adsorbates for group IV.

| #  | Orientation | Position | Ni     | F      | F      | C      | H      | H      | H      | H      | H      | F      |
|----|-------------|----------|--------|--------|--------|--------|--------|--------|--------|--------|--------|--------|
| 1  | d           | 1_5      | -2.240 | -0.147 | -0.581 | -0.003 | -0.001 | -0.002 | -0.000 | -0.001 | 0.002  | -0.397 |
| 2  | f           | 5_3      | -2.224 | 0.181  | -0.065 | 0.003  | 0.002  | 0.001  | 0.000  | 0.003  | -0.004 | 0.512  |
| 3  | u           | 0_2      | 0.106  | -0.020 | -0.017 | -0.000 | -0.000 | -0.000 | -0.000 | -0.000 | -0.006 | 0.000  |
| 4  | f           | 3_2      | -2.212 | -0.540 | -0.425 | -0.026 | -0.003 | -0.003 | -0.002 | -0.029 | 0.002  | -0.226 |
| 5  | d           | 2_5      | -2.222 | -0.448 | -0.522 | -0.024 | 0.002  | -0.003 | -0.002 | -0.029 | -0.003 | -0.204 |
| 6  | d           | 1_2      | -2.219 | -0.586 | -0.577 | -0.001 | -0.000 | -0.000 | -0.000 | -0.000 | 0.000  | -0.025 |
| 7  | f           | 5_2      | -2.220 | -0.575 | -0.582 | -0.001 | -0.000 | -0.000 | -0.000 | -0.000 | 0.000  | -0.033 |
| 8  | d           | 5_2      | -2.220 | -0.582 | -0.585 | -0.001 | -0.000 | 0.000  | -0.000 | -0.000 | 0.000  | -0.020 |
| 9  | d           | 4_2      | -2.219 | -0.585 | -0.579 | -0.001 | -0.000 | -0.000 | -0.000 | -0.000 | 0.000  | -0.026 |
| 10 | d           | 0_2      | -2.220 | -0.571 | -0.598 | -0.001 | -0.000 | -0.000 | -0.000 | -0.000 | -0.000 | -0.017 |
| 11 | d           | 1_3      | -2.220 | -0.586 | -0.582 | -0.001 | -0.000 | -0.000 | -0.000 | -0.000 | 0.000  | -0.013 |
| 12 | d           | 2_3      | -2.221 | -0.575 | -0.574 | -0.002 | -0.000 | -0.001 | -0.001 | -0.002 | 0.000  | -0.002 |
| 13 | d           | 5_3      | -2.221 | -0.571 | -0.575 | -0.002 | -0.001 | -0.000 | -0.000 | -0.001 | 0.000  | -0.005 |
| 14 | f           | 2_3      | -2.220 | -0.581 | -0.578 | -0.001 | -0.000 | -0.001 | -0.000 | -0.001 | 0.000  | -0.006 |
| 15 | d           | 1_4      | -2.222 | -0.571 | -0.566 | -0.004 | -0.001 | -0.001 | -0.000 | -0.003 | 0.000  | -0.006 |
| 16 | d           | 4_3      | -2.219 | -0.592 | -0.580 | -0.001 | -0.000 | -0.000 | -0.001 | -0.000 | 0.000  | -0.012 |
| 17 | d           | 3_2      | -2.216 | -0.575 | -0.538 | -0.001 | -0.000 | -0.000 | -0.000 | -0.001 | 0.001  | -0.085 |
| 18 | d           | 3_5      | -2.219 | -0.578 | -0.581 | -0.001 | -0.000 | -0.000 | -0.001 | -0.001 | 0.000  | -0.004 |
| 19 | d           | 3_4      | -2.221 | -0.570 | -0.574 | -0.001 | -0.000 | -0.001 | -0.001 | -0.001 | 0.000  | -0.002 |
| 20 | u           | 4_5      | -2.219 | -0.586 | -0.577 | -0.001 | -0.000 | -0.000 | -0.000 | -0.000 | -0.021 | 0.000  |
| 21 | d           | 0_3      | -2.219 | -0.580 | -0.595 | -0.000 | -0.000 | -0.000 | -0.000 | -0.000 | 0.000  | -0.011 |
| 22 | d           | 3_0      | -2.221 | -0.566 | -0.572 | -0.002 | -0.000 | -0.001 | -0.001 | -0.001 | 0.000  | -0.004 |
| 23 | d           | 1_0      | -2.220 | -0.577 | -0.578 | -0.001 | -0.000 | -0.000 | -0.000 | -0.000 | 0.000  | -0.004 |
| 24 | u           | 1_2      | -2.228 | 0.394  | 0.156  | 0.000  | 0.000  | 0.000  | -0.000 | 0.000  | 0.088  | -0.001 |
| 25 | f           | 1_2      | -2.229 | 0.395  | 0.159  | 0.000  | 0.000  | 0.000  | -0.000 | 0.000  | -0.001 | 0.086  |
| 26 | u           | 5_2      | -0.908 | -0.305 | -0.601 | -0.001 | -0.000 | -0.000 | 0.000  | -0.000 | -0.067 | 0.001  |

Table S19: Charge transfer for the surface nickel, fluorine and the adsorbates for group IV.

| #  | Orientation | Position | Ni     | F      | F     | C      | H      | H      | H      | H      | F      | H     |
|----|-------------|----------|--------|--------|-------|--------|--------|--------|--------|--------|--------|-------|
| 1  | d           | 1_5      | -0.015 | 0.353  | 0.030 | -0.002 | -0.013 | -0.012 | 0.009  | -0.001 | -0.356 | 0.042 |
| 2  | f           | 5_3      | -0.011 | 0.067  | 0.433 | -0.008 | -0.015 | 0.007  | -0.001 | -0.008 | -0.467 | 0.044 |
| 3  | u           | 0_2      | 0.079  | 0.111  | 0.118 | -0.003 | -0.033 | -0.009 | 0.013  | -0.007 | -0.058 | 0.045 |
| 4  | f           | 3_2      | 0.018  | 0.051  | 0.162 | -0.015 | 0.007  | -0.030 | -0.006 | -0.065 | -0.208 | 0.026 |
| 5  | d           | 2_5      | 0.002  | 0.130  | 0.075 | -0.033 | -0.725 | -0.014 | 0.013  | -0.074 | -0.193 | 0.753 |
| 6  | d           | 1_2      | 0.001  | 0.006  | 0.030 | 0.025  | -0.016 | -0.021 | -0.009 | -0.014 | -0.050 | 0.054 |
| 7  | f           | 5_2      | 0.001  | 0.015  | 0.028 | 0.020  | -0.027 | -0.024 | 0.006  | -0.008 | -0.063 | 0.057 |
| 8  | d           | 5_2      | -0.002 | 0.004  | 0.026 | 0.028  | -0.033 | 0.014  | -0.020 | -0.025 | -0.054 | 0.063 |
| 9  | d           | 4_2      | 0.003  | 0.004  | 0.032 | -0.011 | -0.007 | -0.004 | 0.012  | -0.023 | -0.055 | 0.055 |
| 10 | d           | 0_2      | 0.001  | 0.020  | 0.008 | 0.016  | -0.033 | -0.023 | 0.014  | -0.007 | -0.040 | 0.049 |
| 11 | d           | 1_3      | 0.002  | 0.006  | 0.022 | 0.034  | -0.009 | -0.044 | -0.004 | -0.012 | -0.039 | 0.051 |
| 12 | d           | 2_3      | -0.002 | 0.016  | 0.032 | 0.035  | -0.041 | -0.025 | -0.005 | -0.020 | -0.050 | 0.060 |
| 13 | d           | 5_3      | -0.002 | 0.016  | 0.035 | 0.009  | -0.020 | -0.046 | -0.015 | 0.017  | -0.050 | 0.058 |
| 14 | f           | 2_3      | 0.001  | 0.008  | 0.028 | 0.007  | -0.029 | -0.025 | 0.008  | -0.008 | -0.039 | 0.052 |
| 15 | d           | 1_4      | -0.002 | 0.020  | 0.040 | -0.014 | 0.001  | -0.010 | -0.023 | -0.018 | -0.054 | 0.061 |
| 16 | d           | 4_3      | -0.001 | -0.004 | 0.032 | -0.012 | -0.017 | 0.031  | -0.014 | -0.022 | -0.038 | 0.052 |
| 17 | d           | 3_2      | 0.001  | 0.027  | 0.070 | 0.007  | -0.012 | 0.006  | 0.003  | -0.031 | -0.107 | 0.042 |
| 18 | d           | 3_5      | 0.001  | 0.012  | 0.025 | 0.027  | -0.034 | -0.000 | -0.018 | -0.023 | -0.045 | 0.059 |
| 19 | d           | 3_4      | 0.000  | 0.016  | 0.033 | 0.037  | -0.056 | -0.013 | -0.026 | 0.002  | -0.048 | 0.053 |
| 20 | u           | 4_5      | 0.003  | -0.004 | 0.037 | -0.007 | 0.011  | -0.020 | -0.011 | -0.004 | -0.046 | 0.050 |
| 21 | d           | 0_3      | 0.003  | 0.008  | 0.013 | -0.019 | -0.014 | -0.001 | 0.012  | -0.014 | -0.033 | 0.048 |
| 22 | d           | 3_0      | -0.001 | 0.020  | 0.036 | 0.068  | -0.049 | -0.056 | -0.015 | -0.007 | -0.051 | 0.055 |
| 23 | d           | 1_0      | -0.001 | 0.014  | 0.027 | 0.058  | -0.052 | -0.014 | -0.029 | -0.012 | -0.036 | 0.047 |
| 24 | u           | 1_2      | -0.007 | 0.035  | 0.095 | 0.002  | -0.007 | -0.016 | 0.003  | -0.017 | -0.110 | 0.043 |
| 25 | f           | 1_2      | -0.007 | 0.033  | 0.095 | 0.010  | -0.014 | -0.014 | 0.001  | -0.015 | -0.105 | 0.036 |
| 26 | u           | 5_2      | 0.130  | 0.031  | 0.022 | -0.031 | -0.004 | -0.019 | 0.021  | -0.001 | -0.087 | 0.042 |

Table S20: Calculated frequencies for group IV

| 1_5     | 5_3     | 0_2     | 3_2     | 2_5     | 1_2     | 5_2     | 5_2     | 4_2     |
|---------|---------|---------|---------|---------|---------|---------|---------|---------|
| d       | f       | u       | f       | d       | d       | f       | d       | d       |
| 3090.69 | 3090.42 | 3746.3  | 3175.63 | 3259.51 | 3755.63 | 3771.93 | 3756.69 | 3783.77 |
| 3087.94 | 3077.81 | 3102.66 | 3096.41 | 3089.96 | 3099.73 | 3098.14 | 3097.84 | 3105.72 |
| 3072.56 | 3069.25 | 3071.0  | 3091.79 | 3086.13 | 3071.06 | 3070.82 | 3072.42 | 3072.68 |
| 2973.01 | 2970.44 | 3064.95 | 3011.41 | 3008.88 | 3063.3  | 3062.73 | 3064.2  | 3063.94 |
| 1646.8  | 1827.24 | 2960.68 | 2831.56 | 2843.62 | 2957.05 | 2956.98 | 2957.25 | 2959.92 |
| 1484.59 | 1492.51 | 1515.05 | 1397.12 | 1386.17 | 1527.53 | 1527.28 | 1528.78 | 1519.79 |
| 1477.87 | 1470.65 | 1512.71 | 1370.06 | 1363.46 | 1518.85 | 1521.11 | 1518.81 | 1519.31 |
| 1279.13 | 1276.87 | 1320.06 | 1209.18 | 1197.12 | 1304.97 | 1301.1  | 1304.09 | 1311.24 |
| 1272.47 | 1265.33 | 1299.18 | 1151.12 | 1126.97 | 1294.07 | 1292.1  | 1293.82 | 1296.58 |
| 1268.23 | 1260.79 | 1253.69 | 1144.58 | 1097.36 | 1271.89 | 1274.88 | 1273.45 | 1265.0  |
| 1115.06 | 1119.92 | 571.5   | 750.64  | 698.88  | 469.68  | 468.68  | 469.0   | 471.79  |
| 935.26  | 963.47  | 552.56  | 637.59  | 606.07  | 433.93  | 417.08  | 427.9   | 411.45  |
| 497.38  | 495.63  | 406.0   | 502.05  | 476.95  | 341.01  | 325.7   | 339.88  | 345.99  |
| 382.51  | 430.11  | 366.23  | 306.98  | 257.07  | 260.27  | 259.42  | 255.65  | 263.56  |
| 349.81  | 330.53  | 251.14  | 259.92  | 225.07  | 240.37  | 228.28  | 233.46  | 233.09  |
| 288.88  | 247.05  | 249.5   | 204.18  | 196.48  | 219.02  | 207.35  | 215.42  | 220.73  |
| 178.14  | 176.83  | 214.53  | 167.94  | 158.76  | 170.1   | 161.02  | 170.07  | 148.09  |
| 165.01  | 142.9   | 208.51  | 160.92  | 145.97  | 148.54  | 149.27  | 146.11  | 147.16  |
| 137.27  | 131.98  | 162.5   | 152.92  | 138.85  | 142.1   | 143.52  | 140.31  | 141.4   |
| 120.59  | 113.23  | 146.86  | 135.55  | 123.16  | 117.52  | 114.39  | 122.47  | 112.27  |
| 103.66  | 92.36   | 107.97  | 116.18  | 101.77  | 106.88  | 107.27  | 111.42  | 97.27   |
| 75.18   | 70.83   | 92.49   | 103.31  | 98.23   | 91.21   | 95.26   | 89.93   | 92.87   |
| 60.66   | 62.23   | 85.54   | 87.03   | 79.11   | 84.44   | 74.67   | 78.94   | 83.81   |
| 39.12   | 37.24   | 73.55   | 75.45   | 64.75   | 73.79   | 60.17   | 74.44   | 68.84   |
| 18.78   | 32.85   | 66.78   | 46.96   | 45.07   | 34.95   | 16.03   | 37.23   | 41.67   |
| 26.76i  | 23.71i  | 38.84   | 41.29   | 24.25i  | 20.5    | 7.86i   | 22.25   | 23.31   |
| 54.07i  | 64.79i  | 9.83    | 14.15   | 55.57i  | 13.38   | 16.84i  | 15.15i  | 22.33i  |
| 0_2     | 1_3     | 2_3     | 5_3     | 2_3     | 1_4     | 4_3     | 3_2     | 3_5     |
| d       | d       | d       | d       | f       | d       | d       | d       | d       |
| 3781.87 | 3773.24 | 3749.67 | 3743.34 | 3742.17 | 3730.72 | 3782.88 | 3804.87 | 3739.4  |
| 3100.41 | 3101.11 | 3086.99 | 3094.64 | 3093.01 | 3104.93 | 3103.59 | 3092.82 | 3094.54 |
| 3071.63 | 3073.69 | 3060.83 | 3069.17 | 3071.46 | 3036.03 | 3071.83 | 3075.11 | 3071.12 |
| 3064.89 | 3065.02 | 3042.03 | 3038.43 | 3052.13 | 3034.34 | 3066.6  | 3070.69 | 3050.1  |
| 2959.64 | 2959.6  | 2946.86 | 2945.19 | 2949.32 | 2943.96 | 2959.71 | 2963.29 | 2949.12 |
| 1526.64 | 1519.76 | 1479.89 | 1489.69 | 1500.94 | 1484.35 | 1516.12 | 1526.49 | 1501.83 |
| 1517.01 | 1508.93 | 1464.64 | 1462.07 | 1497.39 | 1409.28 | 1513.21 | 1520.03 | 1489.24 |
| 1310.48 | 1305.65 | 1271.25 | 1277.65 | 1281.98 | 1279.59 | 1314.88 | 1292.93 | 1283.84 |
| 1296.54 | 1288.98 | 1262.6  | 1265.82 | 1278.1  | 1264.67 | 1295.03 | 1284.59 | 1272.61 |
| 1267.88 | 1267.08 | 1256.72 | 1260.41 | 1266.27 | 1224.77 | 1261.36 | 1281.35 | 1271.15 |
| 471.55  | 466.76  | 465.04  | 464.85  | 467.7   | 465.29  | 473.34  | 474.06  | 470.95  |
| 388.32  | 399.78  | 385.45  | 385.24  | 399.17  | 415.98  | 395.36  | 369.2   | 410.25  |
| 346.31  | 339.96  | 333.51  | 323.03  | 331.17  | 382.96  | 359.55  | 274.4   | 336.17  |
| 258.15  | 241.05  | 241.4   | 244.85  | 247.49  | 253.75  | 255.22  | 255.11  | 256.97  |

Continued on next page

|         |         |         |         |         |         |         |         |        |
|---------|---------|---------|---------|---------|---------|---------|---------|--------|
| 235.91  | 231.29  | 217.39  | 214.93  | 218.57  | 237.5   | 240.4   | 247.24  | 226.69 |
| 227.5   | 221.87  | 171.01  | 184.9   | 184.72  | 219.32  | 230.62  | 173.59  | 197.0  |
| 148.74  | 143.6   | 151.62  | 167.69  | 171.44  | 150.04  | 147.55  | 151.46  | 171.34 |
| 145.16  | 141.02  | 140.05  | 142.39  | 141.12  | 140.69  | 144.74  | 148.81  | 144.45 |
| 137.28  | 139.08  | 138.26  | 139.8   | 139.15  | 138.08  | 136.77  | 136.04  | 141.13 |
| 115.25  | 113.55  | 114.8   | 128.23  | 124.92  | 116.72  | 108.55  | 119.66  | 116.27 |
| 102.05  | 97.51   | 106.12  | 117.15  | 115.62  | 104.63  | 94.03   | 105.97  | 112.17 |
| 87.78   | 81.2    | 72.14   | 95.2    | 70.15   | 79.6    | 87.49   | 74.65   | 79.32  |
| 82.19   | 78.61   | 62.4    | 78.61   | 60.37   | 74.43   | 79.22   | 68.9    | 70.49  |
| 67.0    | 61.62   | 41.69   | 64.23   | 44.28   | 51.75   | 57.05   | 50.78   | 48.07  |
| 30.7    | 43.28   | 36.11   | 56.43   | 33.04   | 24.66   | 32.01   | 42.89   | 38.72  |
| 13.01   | 16.02   | 19.97   | 26.86   | 10.25i  | 19.7    | 22.48   | 11.46   | 23.0   |
| 21.27i  | 27.99i  | 16.88i  | 13.07i  | 35.93i  | 31.87i  | 5.0i    | 17.89i  | 12.3i  |
| 3_4     | 4_5     | 0_3     | 3_0     | 1_0     | 1_2     | 1_2     | 5_2     |        |
| d       | u       | d       | d       | d       | u       | f       | u       |        |
| 3753.95 | 3796.08 | 3765.82 | 3741.11 | 3736.96 | 3718.06 | 3750.34 | 3746.41 |        |
| 3082.25 | 3102.67 | 3102.71 | 3085.87 | 3097.63 | 3101.65 | 3097.21 | 3101.25 |        |
| 3063.61 | 3074.62 | 3072.19 | 3063.02 | 3073.02 | 3070.29 | 3071.23 | 3072.7  |        |
| 3044.73 | 3067.89 | 3066.78 | 3044.95 | 3048.39 | 3059.08 | 3061.83 | 3061.05 |        |
| 2943.41 | 2963.02 | 2958.94 | 2944.8  | 2950.27 | 2955.85 | 2957.7  | 2957.55 |        |
| 1483.49 | 1523.42 | 1520.53 | 1490.41 | 1501.85 | 1524.65 | 1526.42 | 1525.82 |        |
| 1459.26 | 1515.93 | 1513.91 | 1449.15 | 1480.08 | 1520.21 | 1522.09 | 1522.05 |        |
| 1274.03 | 1310.97 | 1312.32 | 1282.79 | 1277.73 | 1304.38 | 1297.43 | 1302.49 |        |
| 1268.29 | 1295.71 | 1292.04 | 1260.97 | 1275.11 | 1295.12 | 1292.72 | 1294.68 |        |
| 1253.26 | 1266.22 | 1265.15 | 1244.43 | 1267.13 | 1266.63 | 1272.74 | 1271.42 |        |
| 466.77  | 468.69  | 474.78  | 464.99  | 468.58  | 471.75  | 471.32  | 474.05  |        |
| 355.45  | 378.24  | 406.27  | 364.63  | 395.52  | 428.12  | 401.89  | 428.28  |        |
| 335.32  | 338.15  | 360.3   | 354.95  | 340.01  | 344.55  | 318.6   | 338.44  |        |
| 243.47  | 257.16  | 248.74  | 245.05  | 251.2   | 308.89  | 303.15  | 289.35  |        |
| 222.1   | 234.86  | 241.6   | 217.8   | 223.05  | 233.26  | 206.47  | 238.32  |        |
| 163.17  | 217.29  | 230.79  | 166.86  | 198.54  | 206.11  | 203.52  | 227.79  |        |
| 148.28  | 146.86  | 150.75  | 142.36  | 173.23  | 166.34  | 161.8   | 194.34  |        |
| 141.54  | 140.52  | 143.66  | 140.33  | 140.25  | 164.14  | 148.62  | 171.37  |        |
| 140.37  | 131.16  | 132.36  | 139.7   | 138.42  | 149.91  | 143.91  | 143.07  |        |
| 109.64  | 108.82  | 113.14  | 135.55  | 118.76  | 139.94  | 134.06  | 134.0   |        |
| 94.86   | 97.4    | 88.02   | 121.77  | 106.03  | 110.02  | 107.59  | 118.48  |        |
| 78.86   | 83.23   | 83.31   | 76.66   | 75.1    | 104.8   | 97.33   | 111.6   |        |
| 58.38   | 75.09   | 71.65   | 65.43   | 46.49   | 83.6    | 69.54   | 77.6    |        |
| 45.2    | 49.33   | 48.97   | 40.6    | 30.37   | 58.52   | 54.99   | 69.75   |        |
| 36.03   | 26.29   | 37.9    | 22.77   | 16.48i  | 43.38   | 27.97   | 50.7    |        |
| 17.79i  | 20.3    | 18.7    | 27.29i  | 23.54i  | 22.09   | 3.95i   | 44.06   |        |
| 32.18i  | 21.31i  | 31.56i  | 39.49i  | 46.68i  | 32.73i  | 26.25i  | 23.81   |        |

### 3 Stability of the $\text{NiF}_2(\text{F}_2)$ (001) surface

Figure S6 shows the surface energy of different surface cuts of  $\text{NiF}_2$  versus the potential calculated via the computational hydrogen electrode. The surface model under investigation in this work is denoted by orange dashed line. A detailed explanation of how the surface energies are calculated and detailed discussion of other surface cuts can be found in reference [22]. Potentials at which the Ni(III) and Ni(IV) surfaces are stabilised are marked with arrows.

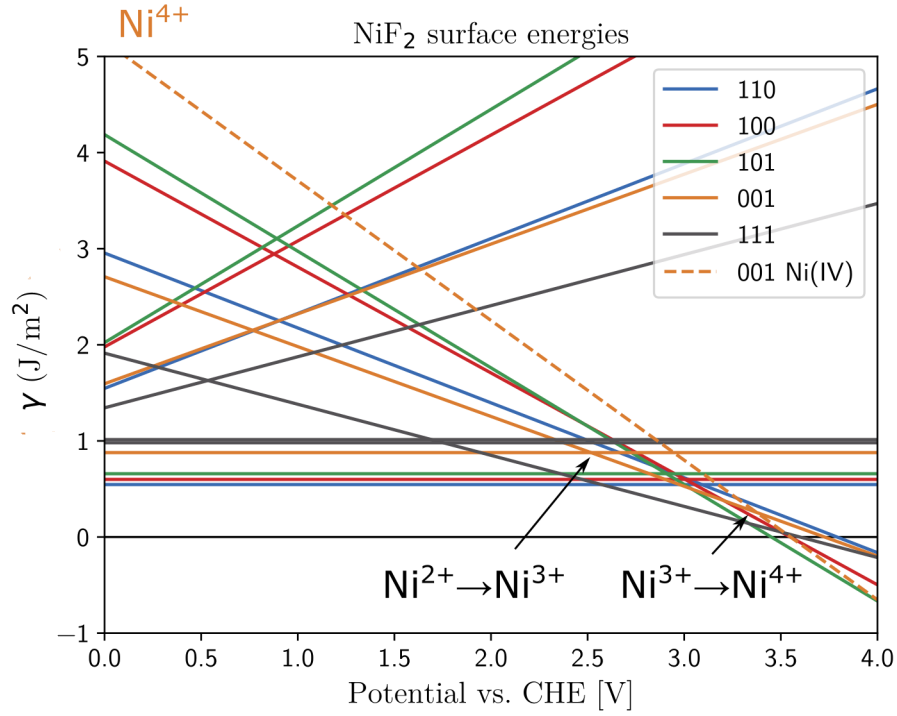

Figure S6: Surface energies of different cuts of  $\text{NiF}_2$  surface versus the potential calculated via the computational hydrogen electrode. The surface energies of the  $\text{Ni}^{2+}$  to  $\text{Ni}^{3+}$  transition are taken from reference [22]. The same methodology as in this reference was applied to calculate the surface energy of  $\text{NiF}_2(\text{F}_2)$  (001) surface, shown with dashed line.

### 4 Plot of imaginary vibrational mode from NEB

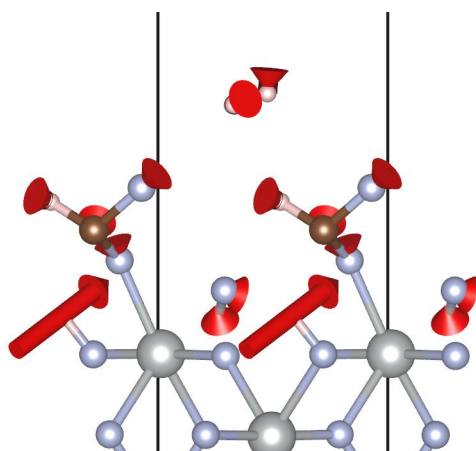

Figure S7: Imaginary vibrational mode displacements of the calculated transition state (image 4 in Figure 7 in the manuscript), with movement of atoms depicted by red arrows.
